# Supplementary material
Source: PubMed Central journal article supplement (PMC2787725)
Supplement: NIHMS154602-supplement-2.pdf [file NIHMS154602-supplement-2.pdf]

# Supplementary Information

## Genome-Wide Association Study reveals genetic risk underlying Parkinson's disease

Javier Simon-Sanchez, Claudia Schulte, Jose M Bras, Manu Sharma, J Raphael Gibbs, Daniela Berg, Coro Paisan-Ruiz, Peter Lichtner, Sonja W Scholz, Dena G Hernandez, Rejko Krüger, Monica Federoff, Christine Klein, Alison Goate, Joel Perlmutter, Michael Bonin, Michael A Nalls, Thomas Illig, Christian Gieger, Henry Houlden, Michael Steffens, Michael S. Okun, Mark Cookson, Kelly D Foote, Hubert H Fernandez, Bryan J. Traynor, Stefan Schreiber, Sampath Arepalli, Ryan Zonozi, Katrina Gwinn, Marcel van der Brug, Grisel Lopez, Stephen J Chanock, Arthur Schatzkin, Yikyung Park, Albert Hollenbeck, Jianjun Gao, Xuemei Huang, Nick W Wood, Delia Lorenz, Günther Deuschl, Honglei Chen, Olaf Riess, John A Hardy, Andrew B Singleton, Thomas Gasser

## Supplementary Note

### Stage I Subjects

US cohort

The total number of cases and controls from the United States included in stage I of this project was 4,134, comprising 1,063 cases and 3,071 controls.

*PD samples:* 988 of the patients were derived from the NINDS-funded Neurogenetics Repository at the Coriell Institute for Medical research (Camden, NJ, USA, [www.coriell.org](http://www.coriell.org)). Samples from the precompiled panels NDPT001, NDPT005, NDPT007, NDPT014, NDPT015, NDPT016, NDPT017 and NDPT018, as well as 250 non-paneled samples, were included in the experiments. In addition, 75 PD cases collected by a movement disorders specialist in the Laboratory of Neurogenetics were also included (KG).

All patients were Caucasian individuals with idiopathic Parkinson's disease from the United States. The mean age at onset of the parkinsonian syndrome was 55.91 years, ranging from 7 to 98 years. Age at onset was defined as the time when symptom(s) of PD were first noted (including at least one: resting tremor, rigidity, bradykinesia, gait disorder, postural instability). Coriell Institute samples required complete NINDS Repository Clinical Data Elements, in order to be included. According to those criteria, all subjects had bradykinesia, and at least one of the following: muscular rigidity, 4-6 Hz resting tremor, postural instability (not caused by primary visual, vestibular, cerebellar, or proprioceptive dysfunction). None had exclusionary features. All had documentation of sustained, excellent response to anti-parkinsonian therapy.

Informed consent was obtained for every participant under locally approved protocols. All subjects were queried regarding family history of parkinsonism, dementia, tremor, gait disorders, and other neurological dysfunction. Subjects with and without family history of Parkinson's disease were included in this panel. However, patients with three or more relatives with parkinsonism or with an apparent Mendelian inheritance of PD were excluded.

*Coriell Institute neurologically normal controls:* Samples included in precompiled panels NDPT002, NDPT006, NDPT009, NDPT019, NDPT020, NDPT021, NDPT022, NDPT023 and NDPT024 were used for this study, leading to a total of 828 control individuals. All individuals are reported to be unrelated Caucasians free from any neurological disorders. All individuals were asked specifically regarding the following disorders: Alzheimer's disease, amyotrophic lateral sclerosis, ataxia, autism, bipolar disorder, cerebrovascular disease, dementia, dystonia, Parkinson's disease, and schizophrenia. None had any first-degree relative with a known primary neurological disorder. The mean age of participants was 58 years, ranging from 15 to 98 years. For more information about controls and PD cases from the Coriell institute see <http://ccr.coriell.org>.

*CGEMS initiative controls:* The Cancer Genetic Markers of Susceptibility initiative (CGEMS, Bethesda, USA, <http://cgems.cancer.gov/>) is a three-year, \$14 million initiative aiming to identify genetic alterations that make individuals susceptible to prostate and breast cancer, funded by the National Cancer Institute. For this purpose they have collected not only cancer patients, but also 1,101 male

and 1,142 female controls. Genotyping data from all these 2,243 control samples was generously shared by the National Cancer Institute and included in our study.

#### German cohort

The German cohort consisted of 757 PD cases and 976 population based controls from the KORA and POPGEN surveys.

*PD samples:* The PD cases were collected by movement disorders specialists of the Universities of Munich and Tuebingen, who established the diagnosis according to the UK Brain Bank criteria<sup>1</sup>. The mean age at onset was 56 years, ranging from 28 to 86 years. Both patients with and without a reported family history of Parkinson's disease were included in this panel. However, cases showing clear evidence of dominant inheritance were excluded. In the German cohort 20% reported a family history of PD. All samples and data were collected with informed consent under locally approved protocols.

*KORA survey controls:* 488 control individuals were selected from the KORA survey (Cooperative Health Research in the Region of Augsburg, [www.helmholtz-muenchen.de/kora](http://www.helmholtz-muenchen.de/kora)), a population based study holding more than 18,000 individuals representative of the general population living in or near the region of Augsburg, Germany. All 488 samples were recruited from the KORA F3 survey in which a total of 3,006 subjects were studied in 2005. The age at sampling ranges from 34 to 84 years<sup>2,3</sup>.

*POPGEN survey controls:* 488 healthy control individuals were collected by the 'Population Based Assessment of Genetic Risk Factors' (POPGEN) - Project ([www.popgen.de](http://www.popgen.de)), an on-going cross-sectional epidemiological survey of the population in the most northern part of Germany with Kiel Canal as the southern border. The region covers 1.1 Mio inhabitants. The control individuals were identified through the official population registry of the state of Schleswig-Holstein and were assessed by trained physicians to exclude neurological and other disorders in particular PD<sup>4</sup>.

#### Stage II subjects

For our replication stage, we included a total of 8,208 Caucasian individuals (3,452 cases and 4,756 controls), originally from the United Kingdom (824 cases and 7 controls), North America (1,528 cases and 2,044 controls) and Germany (1,100 cases and 2,168 controls). A brief description of these samples is listed below and in table 1 of the main text:

#### US cohort

*Coriell PD samples:* A total of 207 PD samples that were not available at the time of the Stage I genotyping execution were included in the replication stage. These included 140 males and 65 females from the United States. The age of PD onset ranges from 16 to 80 years with a mean of 54.6 years, defined as when symptom(s) of PD were first noted (including at least one: resting tremor, rigidity, bradykinesia, gait disorder, postural instability).

*The Parkinson's Genes and Environment Study (PAGE) samples:* These include 840 PD cases (643 males and 196 females) and 1700 controls (1329 males and 371 females) identified from a large population-based cohort. Cases were initially identified by self-reported with subsequent verification with patients treating neurologist. The age of onset ranges from 42 to 78 (average 65.8±7.4).

*Washington University at St. Louis:* Patients and spouse controls were recruited consecutively from the Movement Disorders Center at Washington University in St. Louis. PD diagnosis was made using the UK Brain Bank criteria<sup>1</sup>. All controls had normal neurologic examinations. This included 818 samples including 481 (299 males and 182 females) cases and 337 controls (118 males, 219 females).

#### UK cohort

824 cases were included, comprising 466 neuropathologically diagnosed PD cases and 358 clinically diagnosed PD cases. The male to female ratio was 3.5:1, age at onset ranged from 28:86 years (mean 59 years). Diagnosis was made using the UK Brain Bank criteria (Hughes et al, 1992). Additionally, 544 healthy controls were also collected. Male to female ratio was 0.57.

#### German cohort

1323 German controls were selected from the population-based KORA cohort described in stage I. Additionally, sample collection of 793 German controls was performed as part of the "Prospective validation of risk markers for the development of idiopathic Parkinson's disease (PRIPS)" study a longitudinal cohort study in Tuebingen. For this study participants were recruited using two main sources: advertisement in local newspapers, and employees from local companies. Inclusion criteria of this longitudinally designed study were age older than 50 years and no diagnosis of PD. Moreover, 62 German controls were either recruited as spouse controls or through advertisements in the clinic or local press at the movement disorder outpatient clinics at the Departments of Neurology at the

Universities of Luebeck, Germany. All underwent a detailed neurological and movement disorders examination.

607 patients with PD were recruited within the 'POPGEN Parkinson's Disease' - Project (POPGEN-PD). All patients were identified through the data-bases and charts office-based neurologists or neurological hospitals in the popgen region. Only patients fulfilling the British Brain Bank criteria<sup>1</sup> were included. They were contacted by mail and asked for their participation. The protocol was approved by the local ethical committees. 286 German sporadic and familial PD patients were recruited at two university clinics for neurology in Bochum and Tuebingen. All patients were evaluated by a neurologist experienced in movement disorders and were diagnosed as idiopathic PD, based on the UK Parkinson's disease brain bank criteria. 163 cases were collected by movement disorders specialists of the Universities of Munich and Tuebingen, who established the diagnosis according to the UK Brain Bank criteria<sup>1</sup>. Both patients with and without a reported family history of Parkinson's disease were included in this panel. However, cases showing clear evidence of dominant inheritance were excluded. 52 German patients were recruited at the movement disorder outpatient clinics at the Department of Neurology at the University of Luebeck, Germany. Consecutive patients willing to participate were included in the study. All patients underwent a detailed neurological and movement disorders examination.

All subjects gave written informed consent. The study including DNA collection was approved by the local ethical committees.

## **Stage I genotyping**

### *US cohort*

Genotyping of the DNA panels NDPT014, NDPT015, NDPT016, NDPT017, NDPT018, NDPT019, NDPT020, NDPT021, NDPT022, NDPT023, NDPT024, and those 252 non-paneled from the Coriell Institute was performed using HumanHap550 version 3 beadchips, attempting to genotype 555,363 SNPs. The samples collected by the Laboratory of Neurogenetics in Bethesda were assayed with HumanHap550 version 1 beadchips, attempting to genotype 561,467 SNPs. Samples from the Coriell Institute within DNA panels NDPT001, NDPT002, NDPT005, NDPT006, NDPT007 and NDPT009 had previously been genotyped with HumanHap300 beadchips<sup>6</sup>. For the present study these samples were additionally assayed with HumanHap240S beadchips, to provide (combined) the same genotype information as the HumanHap550 version 1 beadchips. The CGEMS controls were also genotyped with HumanHap300 and HumanHap240S beadchips. Using these genotyping platforms, 545,066 unique SNPs were genotyped for each sample of our cohort.

### *German cohort*

Genotyping of all samples was performed with HumanHap550 version 1 beadchips, attempting to genotype 561,467 SNPs. Samples were assayed at three different sites (GSF, Munich, Germany; Illumina, SanDiego, USA; Dept. of Medical Genetics, Tuebingen, Germany). To assess the accuracy of genotyping, Eleven samples were genotyped in duplicates across all batches. The concordance rate of all duplicates was 99.99%, assuring high genotype accuracy.

## **Stage I quality control procedures**

Although it provides the opportunity to scan the whole genome in a relative short period of time, the microarray based sequencing approach also has a major problem: the high rate of false positive results. Thus, eliminating any systematic bias like population stratification (existing when the case and control groups are not well-matched genetically or if several distinct, but unrecognized, sub-populations exist in a cohort) is required to minimize the rate of false positives. All statistical analyses were performed using PLINK<sup>7</sup>.

### *US cohort*

*Low quality genotyping:* Samples with call rates below 95% were repeated using fresh DNA aliquots and if the call rate persisted below this level, the samples were excluded from the analysis. Low-quality genotyping led us to repeat 57 individual samples, of which 41 were ultimately excluded from the analysis, including 16 cases and 25 controls.

*Gender ambiguity:* Individuals with gender ambiguity were flagged based on heterozygosity on chromosome X genotypes (inbreeding coefficient [F] in this chromosome). A male call is made if F is more than 0.8 and a female call if F is less than 0.2. Samples with an ambiguous F score or discrepancies between genotyped and reported sex, were considered as problematic. These samples were analyzed by visual examination of log R ratio and B allele frequency metrics with the Illumina Genome Viewer (IGV) tool within BeadStudio to rule out whether this discrepancy was caused

because of copy number variation or extended homozygosity in chromosome X. These analyses led to the exclusion of 15 samples, including 11 cases and 4 controls.

*Population substructure:* In an attempt to detect the presence of population substructure or ethnically mismatched individuals, pairwise Identity By State (IBS) distances were calculated. Consequently, IBS distance to its “nearest neighbor” was calculated for each individual in our cohort along with 30 trios from Yoruba (Nigeria), 45 unrelated individuals from the Tokyo area in Japan, 45 unrelated individuals from Beijing (China) and 30 US-resident trios with Northern and Western European ancestry from the Centre d’Etude du Polymorphisme Humain (CEPH, Paris, France); data downloaded from the HapMap website ([www.hapmap.org](http://www.hapmap.org)). This distribution was standardized (by the sample mean and variance of nearest neighbor) and inspected for outliers. For this last purpose Multidimensional scaling (MDS) was performed. This analysis showed that except for three individuals with genetic background indicative of African ancestry. These samples were removed from further analysis. The remaining samples clearly shared Caucasian ancestry (supplementary figure 1).

*Non-reported relatedness:* The pairwise clustering based on IBS distances (see previous section) is useful for making estimations of pairwise Identity by Descent (IBD) to find pairs of individuals who look more similar than expected by chance, in a random sample. By estimating the probability of sharing 0, 1, or 2 alleles IBD for any two individuals, a proportion of IBD can be calculated ( $PI-HAT = P [IBD = 2] + 0.5 \times P [IBD = 1]$ ). Using 0.2 as a threshold for PI-HAT, 17 sample pairs were considered too similar to each other. Thus, one member of each pair was removed from further SNP association tests (11 cases and 6 controls). Additionally, PI-HAT data revealed 50 replicates within our dataset including 49 cases and one control. All these samples were also dropped from further analysis.

After this extensive quality-control phase, the final number of fully genotyped samples from the United States was 4,005 including 971 cases and 3,034 controls.

*SNP quality control:* Only those SNPs successfully genotyped in at least 95% of our final set of samples (18,579 SNPs removed) as well as those with a minimum allele frequency (MAF) above 5% (50,758 SNPs removed) and with no extreme departure from Hardy-Weinberg equilibrium (HWE) in controls ( $p > 0.01$ ; 9,043 SNPs removed) were included in our Stage I statistical analyses. These procedures gave us a total of 474,995 SNPs in the US cohort.

#### *German cohort*

*Low quality genotyping:* Any sample with a call rate below 95% was excluded from the analysis. This led us to exclude 18 samples from the analysis (4 cases and 14 controls).

*Gender ambiguity:* Heterozygosity on chromosome X was used to detect gender discrepancies in our sample. Three individuals (2 cases and 1 control) were identified in which ambiguity could not be resolved, thus they were removed from further analysis. Moreover, we assessed the heterozygosity on all autosomes in our population. Excess of heterozygosity reflects genotyping error or contamination of the sample. We excluded 11 individuals (5 cases and 6 controls), which showed more than 4 standard deviations from the sample mean.

*Population substructure:* Population structure was assessed based upon the genome wide average proportion of alleles shared identical by state between two individuals. An agglomerative procedure is used to cluster the individuals into homogenous subsets. IBS distances were calculated between all study subjects and additional individuals, for whom genotype data was downloaded from the HapMap. These individuals originated from Nigeria, China, Japan and the United States with European ancestry. Visualization of sub-structuring in our population was done by the multi-dimensional scaling (MDS) approach, implemented in PLINK<sup>7</sup>. Inspection of the MDS plot (supplementary figure 2) led us to further exclude 6 individuals from our analysis (3 cases and 3 controls).

*Non-reported relatedness:* We excluded close relatives based on IBD estimates. Nine samples were identified as 1<sup>st</sup> and 2<sup>nd</sup> degree relatives and excluded from further analyses (1 case and 8 controls). After applying the stringent filtering criteria as described above, 1686 samples were included in the statistical analyses (742 cases and 944 controls).

*SNP quality control:* Only those SNPs genotyped in at least 95% of our final set of samples (5,387 SNPs removed) as well as those with a minimum allele frequency (MAF) above 5% (51,834 SNPs removed) and with no extreme departure from Hardy-Weinberg equilibrium (HWE) in controls ( $p > 0.01$ ; 5,685 SNPs removed) were included in our Stage I statistical analyses. These procedures gave us a total of 498,560 SNPs in the German cohort.

#### *Combined cohort*

Genotyping results obtained for both the US and the German populations were merged and a further quality control step was taken. This included the removal of SNPs that presented a MAF below 5% (589 SNPs removed), or a genotyping rate below 95% (42,169 SNPs removed) or extreme deviation from HWE ( $p < 0.01$ ) (2,463 SNPs removed). These filters were applied to the combined controls and flagged SNPs were removed from the complete combined cohort. This led us to obtain a total of

463,185 unique SNPs genotyped in 5,691 individuals (including 1,713 cases and 3,978 controls). Although the evidence generated so far supports the idea that population effects are unlikely to mask association or produce false positives when pooling white northern European and North American populations<sup>8</sup>, we reassessed the effect of population structuring in our cohort. Therefore, pair wise Identity by State (IBS) distances were re-calculated for all 5,691 individuals in our cohort with the same procedure as mentioned above. This distribution was standardized (by the sample mean and variance of nearest neighbor) and inspected visually for outliers with a multidimensional scale plot (MDS). As expected, our observation showed that our cohort clearly shared common Caucasian ancestry as shown in supplementary figure 3. Hereafter, we describe the US and the German cohort as combined cohort.

#### *Stage I secondary analyses*

To further confirm that the potential population substructure detected ( $\lambda = 1.17$ ) was not biasing the results obtained in the stage I of our experiments, logistic regression models adjusted for the two principal components of the MDS values after pair-wise IBS were applied. To overcome the confounding of the clustering caused by LD, the components were based on a LD-pruned SNP dataset that was analyzed via MDS in cases and controls for US and German samples separately. This approach revealed a genomic inflation factor (based on median chi-squared) of 1.09116 in the German cohort (mean chi-squared statistic of 1.0992). For the US samples, the genomic inflation factor (based on median chi-squared) was 1.22095 and the mean chi-squared statistic was of 1.24298. The combined genomic inflation factor after genomic control from meta-analysis was 1.067. Application of this model had little effect on the rank order of SNPs carried forward to stage II analysis, although p values were slightly reduced they still remained highly significant. Supplementary table 6 shows the p values for SNPs carried forward to stage II at *SNCA*, *MAPT*, *LRRK2* and *PARK16* loci after this analysis.

#### **Stage II genotyping**

##### GoldenGate genotyping

250 ng of DNA from each sample were activated through a chemical reaction with biotin. After purifying from excess biotin, assay oligonucleotides were added and hybridized to the DNA, and the mixture bound to streptavidin-conjugated paramagnetic particles (SA-PMPs). After the oligo hybridization, mis- and non-hybridized oligos were washed away and allele-specific extension (ASE) and ligation of the hybridized oligos was performed. The extended and ligated products formed synthetic templates that were then amplified through a PCR reaction. The strands containing the fluorescent signal in the PCR products were then isolated and hybridized to the VeraCode beads via an address sequence. After the hybridization, the VeraCode beads were washed and scanned in the BeadXpress Reader (Illumina). After scanning, raw data was imported into BeadStudio v3.1.12 (Illumina) for analysis and genotype calling.

#### **eQTL analysis**

Frozen tissue samples of the frontal cortex were obtained from 133 neurologically normal Caucasian subjects. 100-200mg aliquots of frozen tissue were sub-dissected from each of the samples and used for genotyping and expression assays. Genotyping was performed using Infinium HumanHap550 beadchips (Illumina Inc) followed by imputation to ~1.6 million SNPs after data cleaning, profiling of 22,000 mRNA transcripts was performed using HumanRef-8 Expression BeadChips (Illumina Inc) as previously described<sup>31</sup>.

A regression analysis was performed on the expression intensities generated for mRNA. Gender, age, post-mortem interval, tissue source and hybridization batch were included as covariates. Residuals from the regression analysis for each probe were then used as the quantitative trait for that probe in genome-wide association analysis looking for quantitative trait loci, performed using the *assoc* function within PLINK, which correlates allele dosage with change in the trait<sup>32</sup>. To correct for the large number of SNPs tested per trait, a genome-wide empirical p-value was computed for the asymptotic p-value for each SNP using 1,000 permutations of sample-label swapping. To correct for the number of traits being tested per tissue region, a false discovery rate (FDR) threshold was determined based on the empirical p-values. Empirical p-values were allowed to exceed this threshold if the linkage disequilibrium  $r^2$  was greater than or equal to 0.7 with a SNP with empirical values within the FDR threshold.



## Supplementary Figures

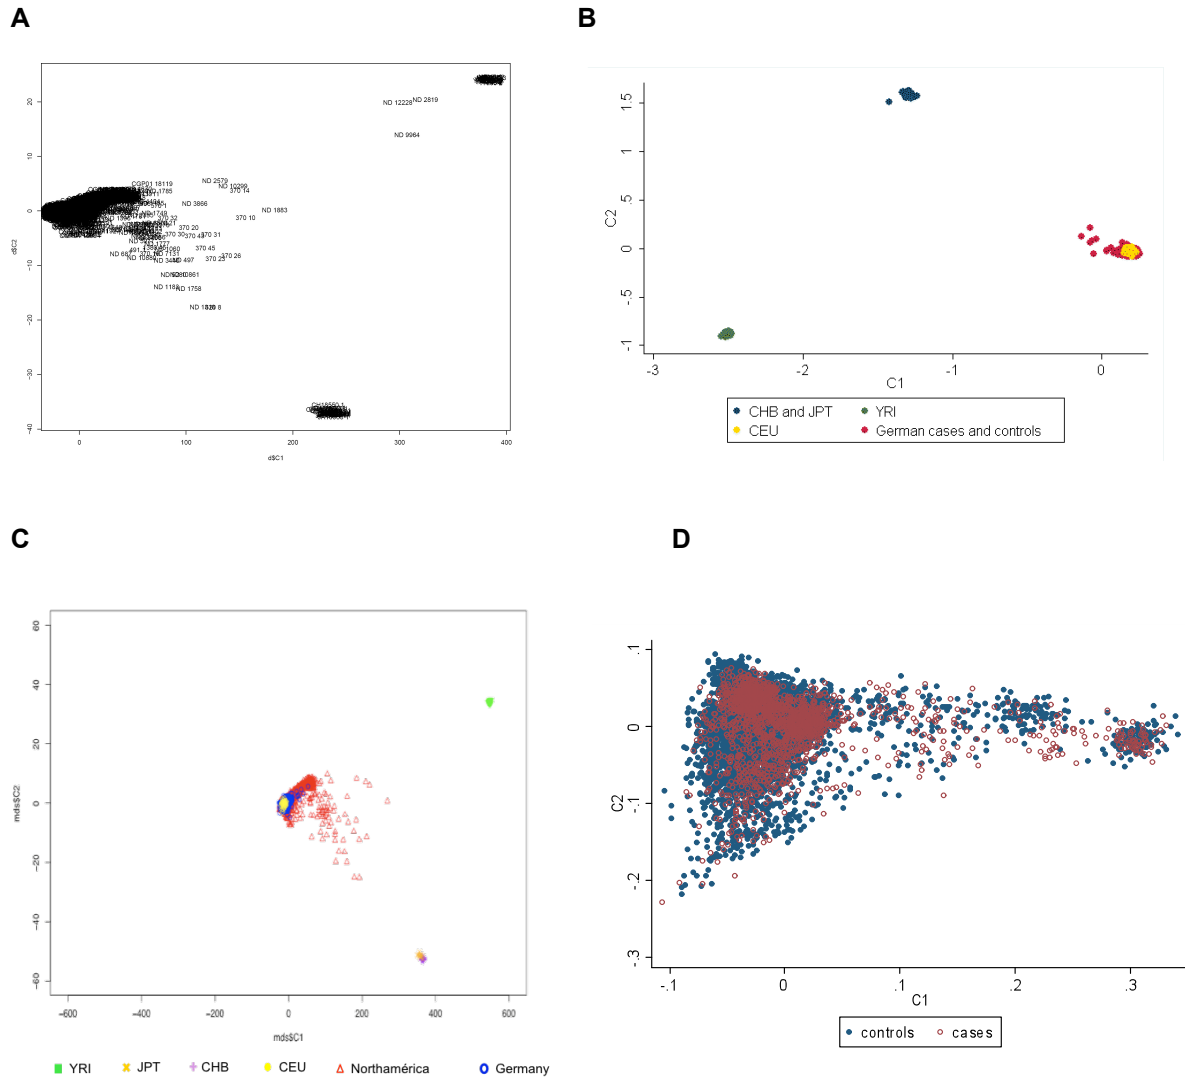

**Supplementary figure 1:** Multidimensional Scaling (MDS) plots for pair-wise Identity by State (IBS) showing the population substructure in our cohort. **A:** Population substructure of the US cohort clustered with HapMap phase II individuals. ND12228, ND2819 and ND9964 clearly shared African ancestry and thus, were removed from further analyses. **B:** Population substructure in the German cohort clustered with hapmap individuals. As clearly shown, there is near perfect overlapping with Caucasian ancestry. **C:** US-German combined cohort clustered with HapMap individuals. Most of our combined cohort subjects perfectly overlap with Caucasian ancestry. **D:** Combined US-German cohort. Cases and Controls are scattered in the same pattern.

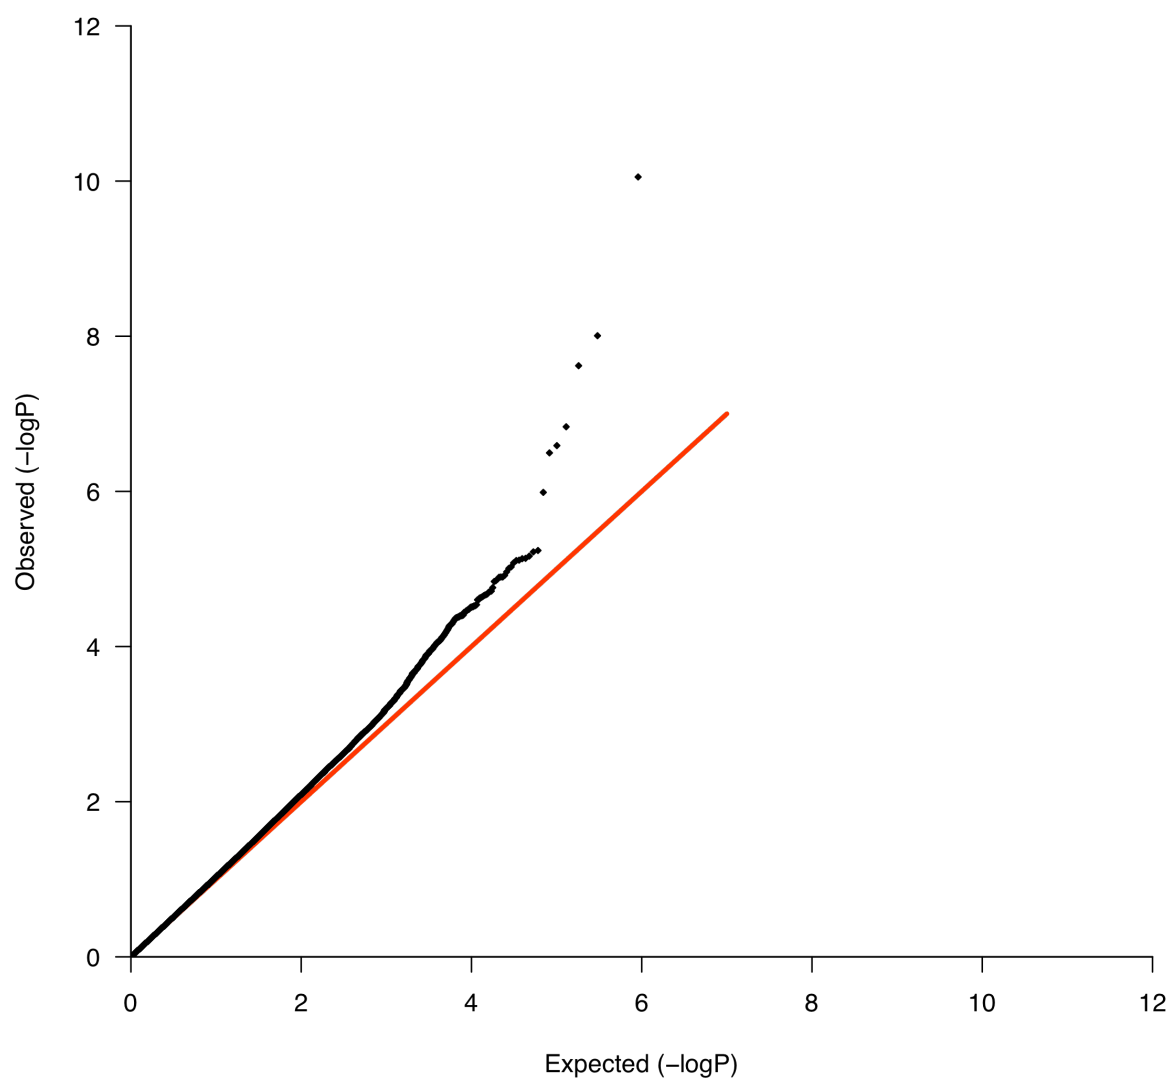

Supplementary figure 2: QQ plot showing the distribution of expected versus observed p values for the stage I combined German-North American cohort. This shows a slight deviation from the expected distribution ( $\lambda = 1.17$ ).



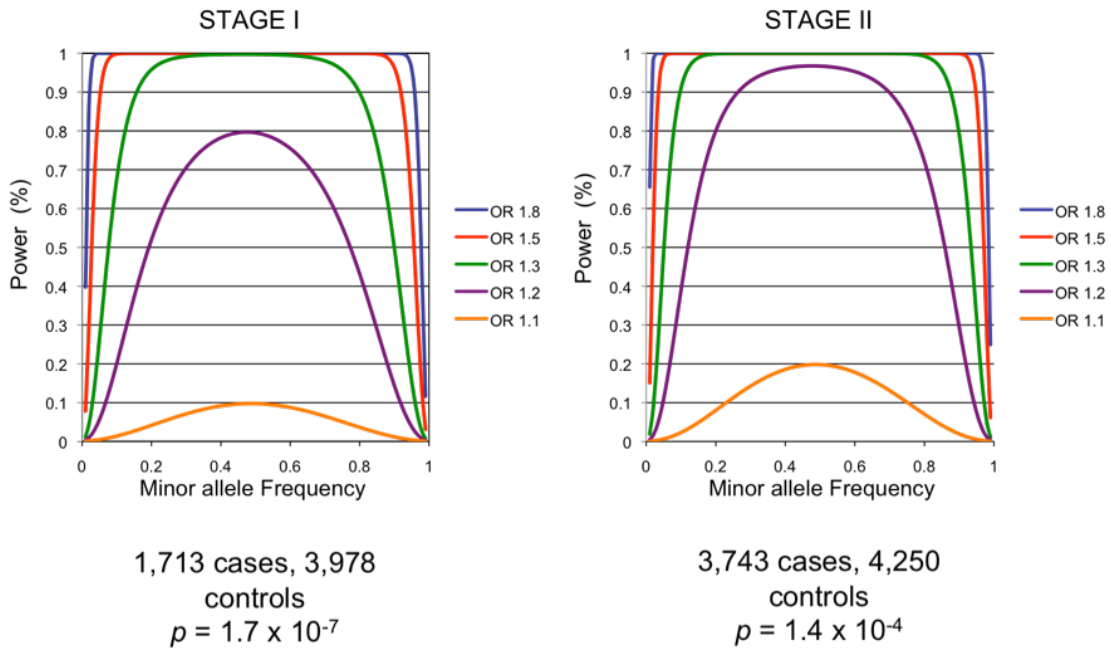

Supplementary figure 3: Power estimates for stage I (A) and stage II (B) of the study. Power on the y-axis is plotted against minor allele frequency with different thresholds for Odds ratio.

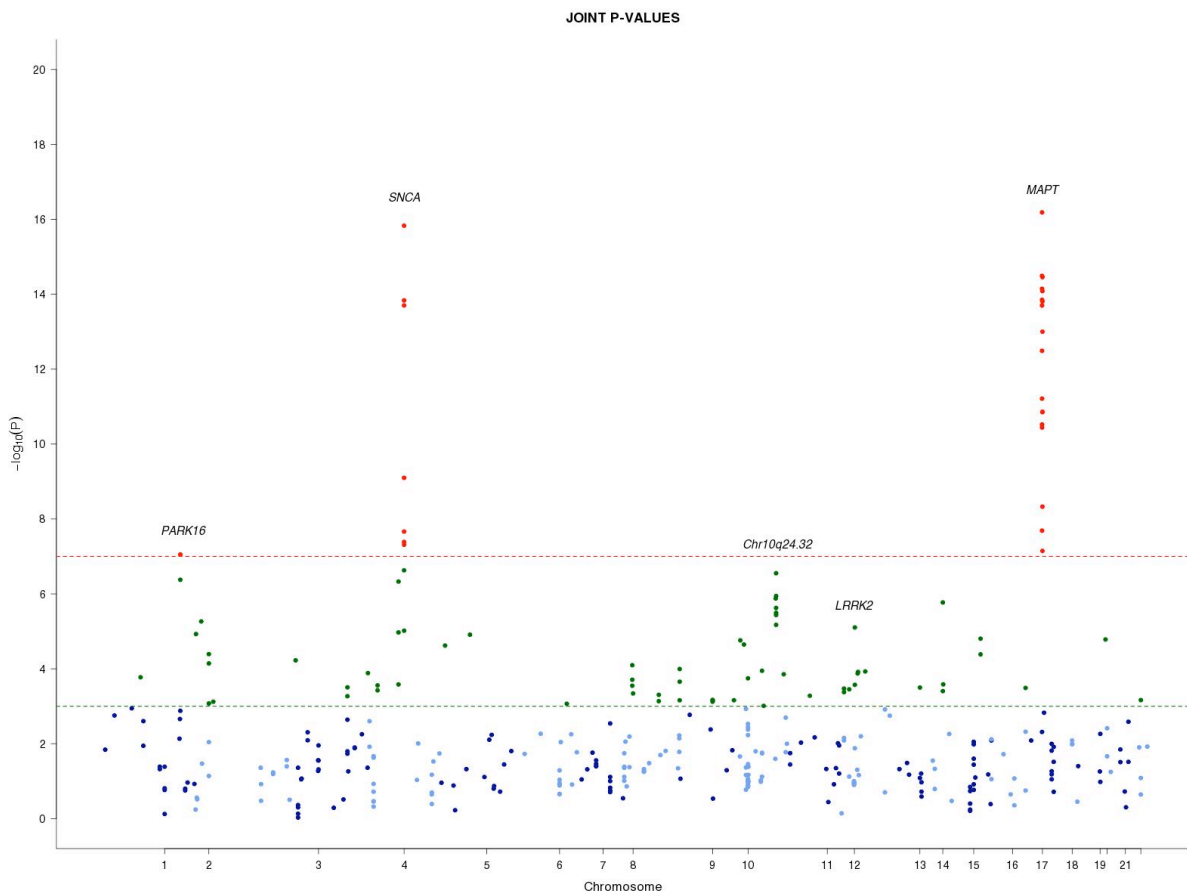

Supplementary figure 4: Graphical representation of p-values generated after combining stage I and stage II. In red SNPs surpassing Bonferroni correction; in green SNPs suggestive to be associated with PD.

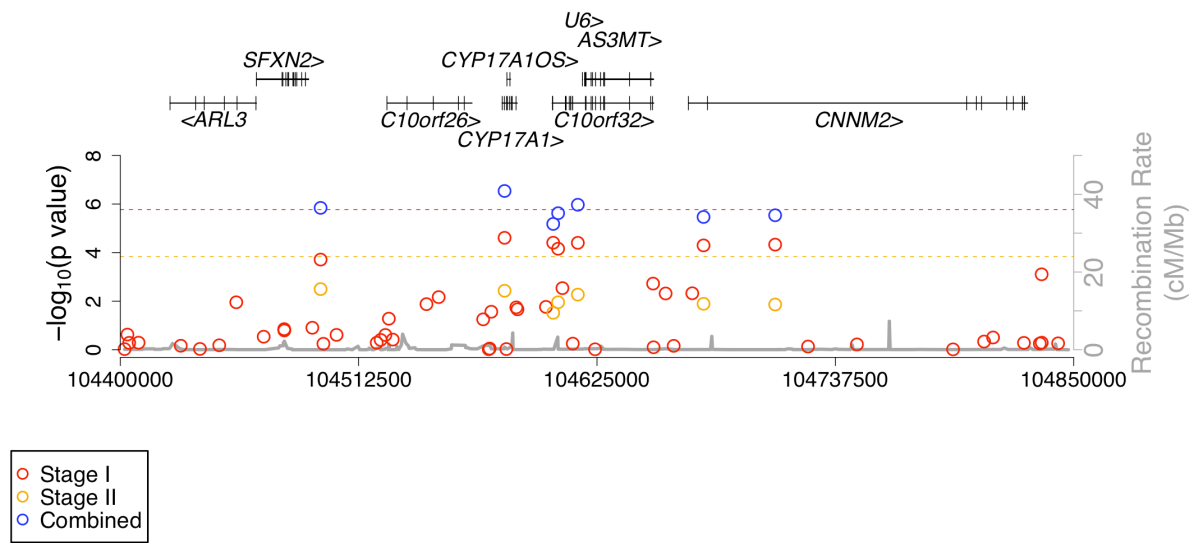

Supplementary figure 5: graphical representation of association p-values and recombination rates at the Chr10q24.32 showing suggestive association with PD. Individual stages and joint p-values are shown.

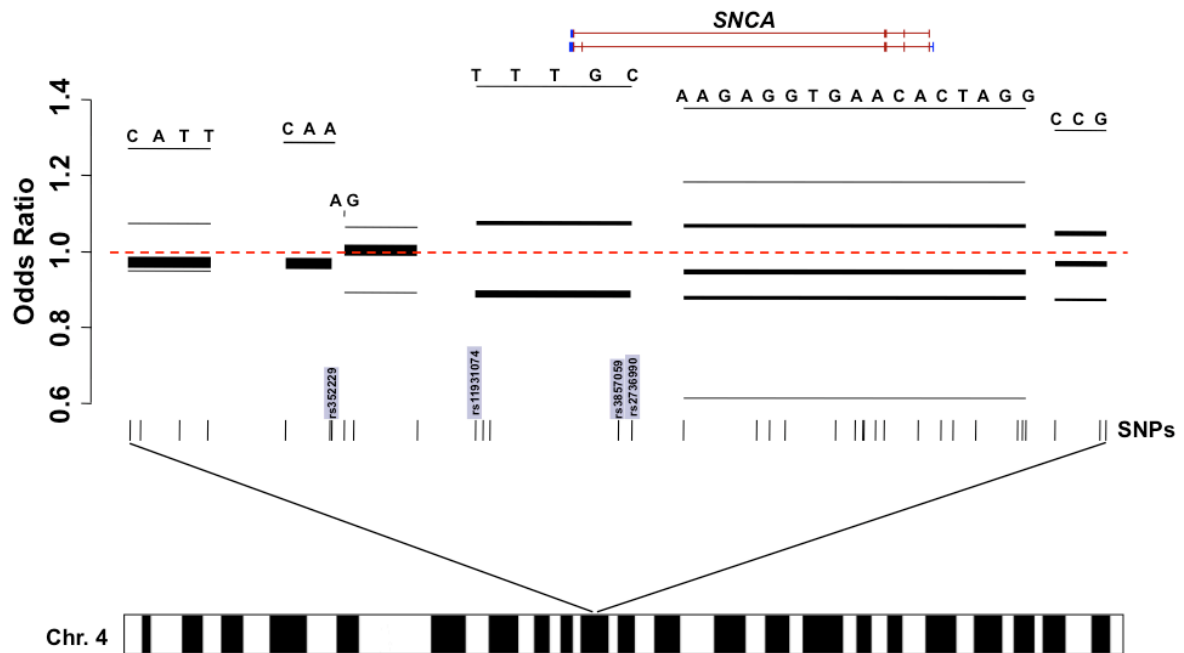

Supplementary figure 6: Odds ratio exerted by each of the haplotypes present in the two LD blocks identified across *SNCA* locus. Each haplotype is represented by a single line, which is wider according to the haplotype frequency. Those SNPs significantly associated with PD after stage II of our analyses are shaded in grey.

**A**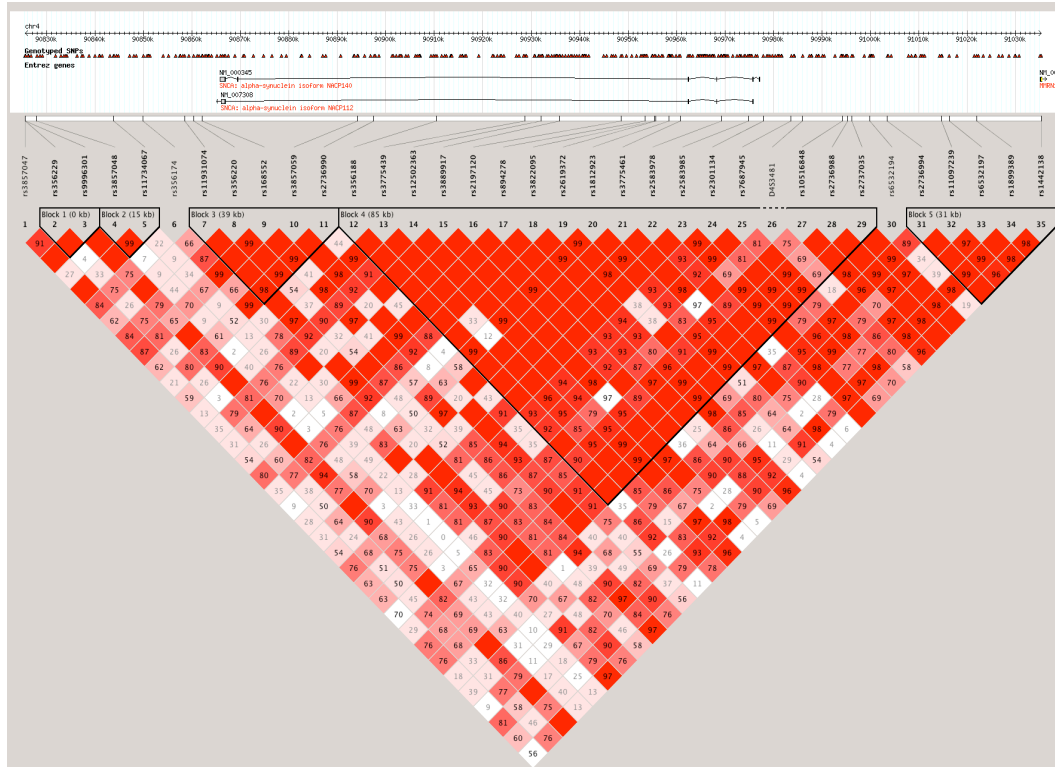**B**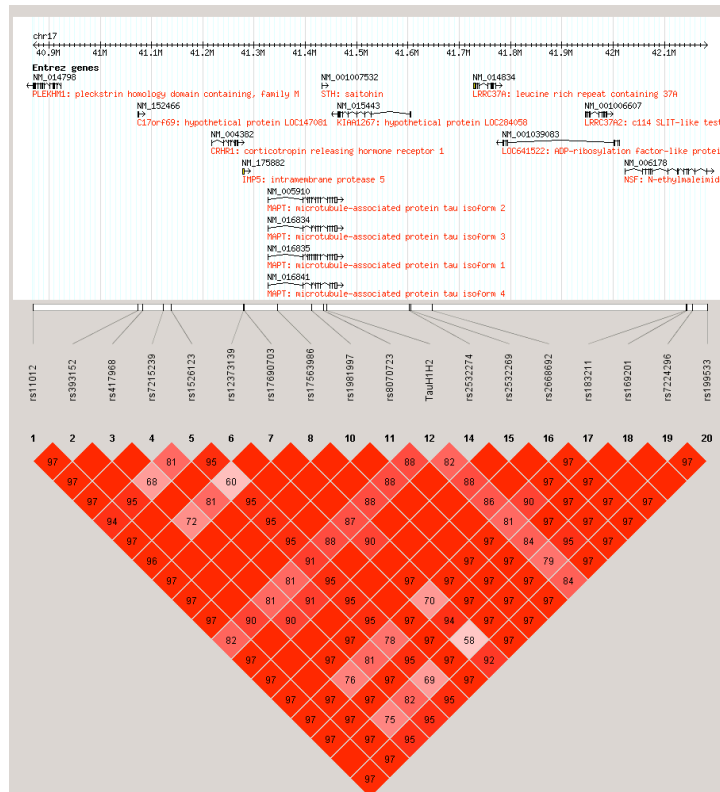

**Supplementary figure 7: LD structure A** across stage I American population in the SNCA locus. REP1 genotypes (D4S3481) have been included for these samples. **B** around *MAPT* H1/H2 polymorphism in the German cohort.

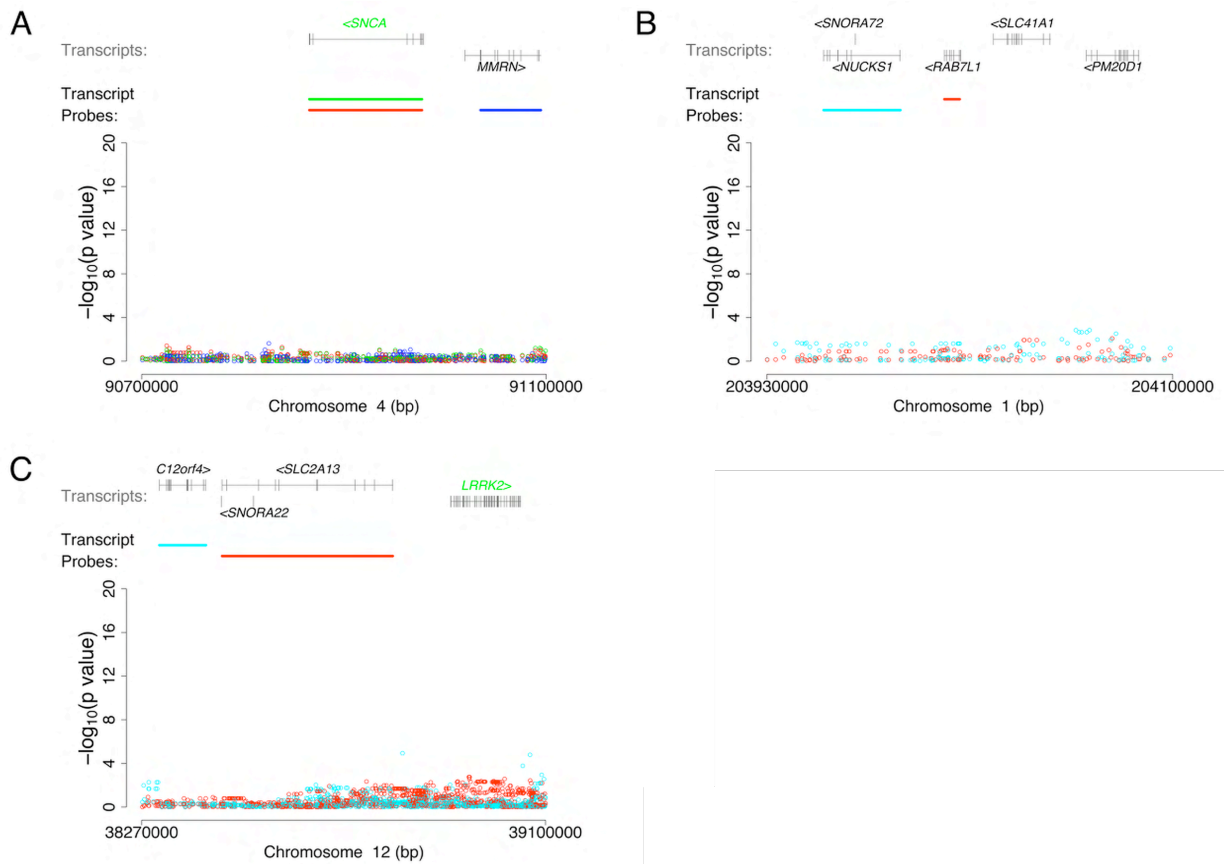

Supplementary figure 8: Expression quantitative trait loci across the *SNCA*, *PARK16* and *LRRK2* loci (A, B and C respectively), measured in 133 human frontal cortex samples; each plot A shows association between genotypes and transcript levels across the locus. In this analysis the allelic load at genotyped polymorphism across the locus is tested for association with transcript levels of each gene across the locus. The results of the analysis are shown as log transformed  $p$  values color-coded to match the transcript of interest.

# Supplementary Tables

Supplementary table 1: SNPs selected for Stage II based on p value and predicted assay efficiency. Stage I, stage II and Joint p-values are shown.

| locus      |      |           |                                   | Stage I |       |          |      |                 | Stage II |       |          |      | Stage I + II |       |          |      |
|------------|------|-----------|-----------------------------------|---------|-------|----------|------|-----------------|----------|-------|----------|------|--------------|-------|----------|------|
| SNP ID     | Chr. | Positon   | Alleles<br>(minor/<br>major) Gene | MAF U   | MAF A | p-value  | cOR  | quality filters | MAF U    | MAF A | p-value  | cOR  | MAF U        | MAF A | p-value  | cOR  |
| rs2736990  | 4    | 90897564  | C/T <i>SNCA</i>                   | 0.46    | 0.52  | 5.69E-09 | 1.27 | OK              | 0.46     | 0.51  | 5.52E-09 | 1.20 | 0.51         | 0.46  | 2.24E-16 | 1.23 |
| rs3857059  | 4    | 90894261  | G/A <i>SNCA</i>                   | 0.07    | 0.10  | 3.60E-08 | 1.58 | OK              | 0.07     | 0.10  | 3.39E-08 | 1.43 | 0.10         | 0.07  | 3.74E-15 | 1.48 |
| rs415430   | 17   | 42214305  | G/A <i>WNT3</i>                   | 0.21    | 0.16  | 4.50E-08 | 0.76 | Non concordant  | NA       | NA    | NA       | NA   | NA           | NA    | NA       | NA   |
| rs11931074 | 4    | 90858538  | T/G <i>SNCA</i>                   | 0.07    | 0.10  | 4.78E-08 | 1.58 | OK              | 0.08     | 0.10  | 3.75E-08 | 1.42 | 0.10         | 0.07  | 1.62E-14 | 1.46 |
| rs199533   | 17   | 42184098  | T/C <i>NSF</i>                    | 0.20    | 0.16  | 5.05E-08 | 0.76 | OK              | 0.20     | 0.17  | 7.95E-08 | 0.79 | 0.17         | 0.20  | 1.09E-14 | 0.78 |
| rs356220   | 4    | 90860363  | T/C <i>SNCA</i>                   | 0.38    | 0.43  | 6.99E-08 | 1.26 | Bad cluster     | NA       | NA    | NA       | NA   | NA           | NA    | NA       | NA   |
| rs169201   | 17   | 42145386  | G/A <i>NSF</i>                    | 0.20    | 0.16  | 1.25E-07 | 0.76 | OK              | 0.20     | 0.17  | 8.82E-08 | 0.79 | 0.17         | 0.20  | 4.39E-14 | 0.78 |
| rs393152   | 17   | 41074926  | G/A <i>C17orf69</i>               | 0.22    | 0.18  | 1.42E-07 | 0.76 | OK              | 0.22     | 0.18  | 1.69E-09 | 0.78 | 0.18         | 0.22  | 1.95E-16 | 0.77 |
| rs12185268 | 17   | 41279463  | G/A <i>IMP5</i>                   | 0.22    | 0.18  | 1.90E-07 | 0.77 | MAF<0.05        | NA       | NA    | NA       | NA   | NA           | NA    | NA       | NA   |
| rs1981997  | 17   | 41412603  | A/G <i>MAPT</i>                   | 0.22    | 0.18  | 2.02E-07 | 0.77 | OK              | 0.21     | 0.18  | 9.11E-08 | 0.80 | 0.18         | 0.22  | 3.55E-14 | 0.78 |
| rs2532274  | 17   | 41602941  | C/T <i>KIAA1267</i>               | 0.22    | 0.18  | 2.22E-07 | 0.77 | OK              | 0.22     | 0.19  | 1.64E-05 | 0.86 | 0.19         | 0.22  | 8.24E-11 | 0.83 |
| rs2532269  | 17   | 41605885  | G/A <i>KIAA1267</i>               | 0.22    | 0.17  | 2.70E-07 | 0.77 | OK              | 0.21     | 0.18  | 6.21E-07 | 0.81 | 0.18         | 0.22  | 5.62E-13 | 0.79 |
| rs8070723  | 17   | 41436901  | G/A <i>MAPT</i>                   | 0.22    | 0.18  | 3.36E-07 | 0.77 | OK              | 0.21     | 0.18  | 9.20E-08 | 0.80 | 0.18         | 0.22  | 9.64E-14 | 0.79 |
| rs17563986 | 17   | 41347100  | G/A <i>MAPT</i>                   | 0.22    | 0.18  | 3.44E-07 | 0.77 | OK              | 0.21     | 0.18  | 3.21E-08 | 0.79 | 0.18         | 0.22  | 1.67E-14 | 0.78 |
| rs2668692  | 17   | 41648797  | T/C <i>LOC644246</i>              | 0.22    | 0.17  | 3.94E-07 | 0.77 | OK              | 0.22     | 0.18  | 5.34E-08 | 0.79 | 0.18         | 0.22  | 7.87E-14 | 0.79 |
| rs11648673 | 16   | 317795    | A/G <i>AXIN1</i>                  | 0.28    | 0.23  | 4.77E-07 | 0.79 | OK              | 0.27     | 0.27  | 0.62     | 1.03 | 0.26         | 0.27  | 5.38E-03 | 0.93 |
| rs12373139 | 17   | 41279910  | A/G <i>IMP5</i>                   | 0.22    | 0.18  | 4.91E-07 | 0.78 | OK              | 0.21     | 0.18  | 1.24E-07 | 0.80 | 0.18         | 0.22  | 7.75E-14 | 0.79 |
| rs239748   | 23   | 18793279  | T/C <i>LOC441484</i>              | 0.17    | 0.22  | 1.17E-06 | 1.44 | Bad cluster     | NA       | NA    | NA       | NA   | NA           | NA    | NA       | NA   |
| rs12431733 | 14   | 53360580  | T/C <i>BMP4</i>                   | 0.44    | 0.49  | 1.52E-06 | 1.22 | OK              | 0.46     | 0.48  | 0.05     | 1.06 | 0.48         | 0.45  | 2.54E-06 | 1.13 |
| rs11591754 | 10   | 35247159  | T/C <i>LOC646213</i>              | 0.20    | 0.16  | 1.68E-06 | 0.78 | OK              | 0.19     | 0.18  | 0.37     | 0.98 | 0.17         | 0.19  | 1.83E-04 | 0.90 |
| rs7013027  | 8    | 2911376   | A/G <i>CSMD1</i>                  | 0.46    | 0.51  | 1.85E-06 | 1.22 | OK              | 0.49     | 0.48  | 0.15     | 0.95 | 0.49         | 0.48  | 0.07     | 1.05 |
| rs11012    | 17   | 40869224  | A/G <i>LOC201175</i>              | 0.18    | 0.15  | 2.85E-06 | 0.78 | OK              | 0.18     | 0.15  | 2.12E-05 | 0.84 | 0.15         | 0.18  | 8.04E-11 | 0.81 |
| rs7004938  | 8    | 140328407 | A/G <i>COL22A1</i>                | 0.43    | 0.38  | 2.97E-06 | 0.82 | Non concordant  | NA       | NA    | NA       | NA   | NA           | NA    | NA       | NA   |
| rs10857899 | 1    | 111929241 | A/G <i>LOC643329</i>              | 0.46    | 0.41  | 3.06E-06 | 0.82 | OK              | 0.45     | 0.45  | 0.85     | 1.00 | 0.43         | 0.45  | 2.39E-03 | 0.93 |
| rs6542651  | 2    | 3737705   | C/T <i>LOC728597</i>              | 0.08    | 0.10  | 3.34E-06 | 1.38 | OK              | 0.08     | 0.09  | 0.05     | 1.09 | 0.09         | 0.08  | 2.84E-05 | 1.18 |
| rs2285459  | 16   | 30402913  | A/G <i>ITGAL</i>                  | 0.45    | 0.40  | 3.38E-06 | 0.83 | Bad cluster     | NA       | NA    | NA       | NA   | NA           | NA    | NA       | NA   |
| rs13027881 | 2    | 6473384   | A/G <i>LOC391349</i>              | 0.15    | 0.11  | 3.76E-06 | 0.74 | OK              | 0.13     | 0.14  | 0.04     | 1.08 | 0.13         | 0.14  | 0.16     | 0.94 |
| rs2492448  | 10   | 35235412  | A/G <i>LOC646213</i>              | 0.30    | 0.26  | 3.84E-06 | 0.82 | OK              | 0.29     | 0.29  | 0.92     | 1.00 | 0.28         | 0.30  | 4.19E-03 | 0.93 |
| rs4957473  | 5    | 39378920  | G/A <i>C9</i>                     | 0.39    | 0.34  | 4.24E-06 | 0.82 | OK              | 0.36     | 0.39  | 1.85E-03 | 1.12 | 0.37         | 0.37  | 0.65     | 0.99 |
| rs3775439  | 4    | 90928764  | A/G <i>SNCA</i>                   | 0.12    | 0.15  | 4.43E-06 | 1.35 | OK              | 0.13     | 0.15  | 1.48E-03 | 1.16 | 0.15         | 0.12  | 2.99E-08 | 1.23 |
| rs6734894  | 2    | 6507379   | A/G <i>LOC391349</i>              | 0.15    | 0.11  | 4.63E-06 | 0.74 | OK              | 0.13     | 0.14  | 0.04     | 1.08 | 0.13         | 0.14  | 0.20     | 0.95 |
| rs4556079  | 8    | 140302117 | C/T <i>COL22A1</i>                | 0.29    | 0.25  | 4.79E-06 | 0.79 | OK              | 0.27     | 0.28  | 0.39     | 1.04 | 0.27         | 0.28  | 0.03     | 0.94 |
| rs2896905  | 12   | 38779683  | A/G <i>SLC2A13</i>                | 0.40    | 0.35  | 5.03E-06 | 0.82 | OK              | 0.38     | 0.38  | 0.73     | 1.01 | 0.37         | 0.39  | 7.81E-03 | 0.93 |
| rs11781101 | 8    | 140316844 | C/T <i>COL22A1</i>                | 0.43    | 0.38  | 5.31E-06 | 0.82 | OK              | 0.42     | 0.42  | 0.77     | 1.01 | 0.41         | 0.42  | 0.01     | 0.94 |
| rs11783351 | 8    | 140328721 | T/C <i>COL22A1</i>                | 0.43    | 0.39  | 5.51E-06 | 0.83 | OK              | 0.42     | 0.42  | 0.78     | 1.01 | 0.41         | 0.42  | 0.01     | 0.94 |
| rs817097   | 17   | 64889657  | G/T <i>MAP2K6</i>                 | 0.35    | 0.31  | 6.22E-06 | 0.81 | OK              | 0.35     | 0.35  | 0.96     | 0.99 | 0.33         | 0.35  | 8.08E-03 | 0.92 |
| rs11644916 | 16   | 299568    | A/G <i>AXIN1</i>                  | 0.29    | 0.25  | 6.24E-06 | 0.82 | OK              | 0.28     | 0.29  | 0.17     | 1.06 | 0.27         | 0.28  | 0.08     | 0.96 |
| rs2856336  | 12   | 11847265  | C/A <i>ETV6</i>                   | 0.08    | 0.11  | 7.69E-06 | 1.38 | OK              | 0.09     | 0.09  | 0.21     | 1.06 | 0.10         | 0.09  | 5.24E-04 | 1.16 |
| rs764660   | 2    | 165921543 | C/A <i>TTC21B</i>                 | 0.31    | 0.35  | 7.83E-06 | 1.20 | Non concordant  | NA       | NA    | NA       | NA   | NA           | NA    | NA       | NA   |
| rs11244079 | 9    | 135174347 | A/G <i>LOC653163</i>              | 0.07    | 0.05  | 8.66E-06 | 0.66 | Bad cluster     | NA       | NA    | NA       | NA   | NA           | NA    | NA       | NA   |
| rs2733333  | 15   | 55223218  | A/G <i>TCF12</i>                  | 0.17    | 0.21  | 9.31E-06 | 1.23 | OK              | 0.18     | 0.17  | 0.39     | 0.97 | 0.19         | 0.18  | 0.07     | 1.06 |
| rs183211   | 17   | 42143493  | A/G <i>NSF</i>                    | 0.24    | 0.20  | 1.05E-05 | 0.80 | OK              | 0.23     | 0.20  | 3.88E-06 | 0.83 | 0.20         | 0.24  | 7.62E-11 | 0.82 |
| rs11878803 | 19   | 57193133  | A/G <i>ZNF615</i>                 | 0.07    | 0.09  | 1.07E-05 | 1.42 | OK              | 0.07     | 0.07  | 0.65     | 1.03 | 0.08         | 0.07  | 6.81E-03 | 1.14 |
| rs7176873  | 15   | 55136454  | A/G <i>TCF12</i>                  | 0.17    | 0.21  | 1.15E-05 | 1.23 | OK              | 0.18     | 0.17  | 0.50     | 0.97 | 0.18         | 0.18  | 0.05     | 1.06 |
| rs17654531 | 1    | 111601208 | G/A <i>LOC728204</i>              | 0.11    | 0.09  | 1.16E-05 | 0.74 | OK              | 0.11     | 0.11  | 0.85     | 0.99 | 0.10         | 0.11  | 5.95E-03 | 0.90 |
| rs7923172  | 10   | 35349373  | A/G <i>CUL2</i>                   | 0.34    | 0.38  | 1.43E-05 | 1.21 | OK              | 0.36     | 0.35  | 0.15     | 0.96 | 0.36         | 0.35  | 0.09     | 1.05 |
| rs4934704  | 10   | 35372170  | T/C <i>CUL2</i>                   | 0.34    | 0.38  | 1.48E-05 | 1.21 | OK              | 0.36     | 0.35  | 0.16     | 0.96 | 0.36         | 0.35  | 0.09     | 1.05 |
| rs2116658  | 2    | 165874918 | T/C <i>SCN2A2</i>                 | 0.31    | 0.35  | 1.48E-05 | 1.20 | OK              | 0.32     | 0.31  | 0.28     | 0.96 | 0.32         | 0.32  | 0.09     | 1.04 |
| rs163321   | 5    | 178679053 | C/T <i>ADAMTS2</i>                | 0.42    | 0.38  | 1.49E-05 | 0.82 | OK              | 0.42     | 0.42  | 0.93     | 1.01 | 0.40         | 0.42  | 0.02     | 0.94 |
| rs869714   | 1    | 165392874 | C/T <i>LOC391130</i>              | 0.51    | 0.47  | 1.54E-05 | 0.84 | OK              | 0.49     | 0.51  | 0.20     | 1.04 | 0.49         | 0.50  | 0.10     | 0.96 |
| rs1865648  | 15   | 45665913  | T/G <i>SEMA6D</i>                 | 0.30    | 0.34  | 1.57E-05 | 1.22 | OK              | 0.31     | 0.30  | 0.20     | 0.95 | 0.32         | 0.31  | 0.12     | 1.05 |
| rs7175191  | 15   | 54973689  | G/A <i>LOC145783</i>              | 0.20    | 0.24  | 1.64E-05 | 1.21 | OK              | 0.21     | 0.21  | 0.88     | 1.01 | 0.22         | 0.20  | 0.02     | 1.07 |
| rs10827492 | 10   | 35469831  | T/C <i>CREM</i>                   | 0.34    | 0.38  | 1.69E-05 | 1.21 | OK              | 0.36     | 0.35  | 0.17     | 0.96 | 0.36         | 0.35  | 0.08     | 1.05 |
| rs10505762 | 12   | 11881877  | T/C <i>ETV6</i>                   | 0.14    | 0.17  | 1.72E-05 | 1.29 | OK              | 0.15     | 0.15  | 0.99     | 0.99 | 0.16         | 0.15  | 0.01     | 1.09 |
| rs13139027 | 4    | 4977067   | A/G <i>LDHAL1</i>                 | 0.08    | 0.05  | 1.75E-05 | 0.69 | OK              | 0.07     | 0.07  | 0.59     | 0.97 | 0.06         | 0.07  | 1.05E-03 | 0.85 |
| rs2491015  | 10   | 70436819  | T/C <i>KIAA1279</i>               | 0.38    | 0.34  | 1.76E-05 | 0.84 | OK              | 0.37     | 0.36  | 0.26     | 0.96 | 0.35         | 0.38  | 1.72E-04 | 0.91 |
| rs4934540  | 10   | 35514705  | C/T <i>CREM</i>                   | 0.34    | 0.38  | 1.83E-05 | 1.21 | OK              | 0.36     | 0.35  | 0.14     | 0.95 | 0.36         | 0.35  | 0.10     | 1.05 |
| rs10784359 | 12   | 38732017  | T/C <i>SLC2A13</i>                | 0.43    | 0.39  | 2.01E-05 | 0.83 | Bad cluster     | NA       | NA    | NA       | NA   | NA           | NA    | NA       | NA   |
| rs10437024 | 1    | 82673852  | C/A <i>LPHN2</i>                  | 0.06    | 0.08  | 2.02E-05 | 1.44 | OK              | 0.06     | 0.06  | 0.49     | 1.04 | 0.07         | 0.06  | 3.99E-03 | 1.16 |





|            |    |           |     |           |      |      |          |      |                             |      |      |          |      |      |      |          |      |
|------------|----|-----------|-----|-----------|------|------|----------|------|-----------------------------|------|------|----------|------|------|------|----------|------|
| rs11642990 | 16 | 85467695  | T/C | LOC729979 | 0.16 | 0.19 | 6.25E-05 | 1.26 | OK                          | 0.17 | 0.16 | 0.17     | 0.94 | 0.17 | 0.16 | 0.25     | 1.04 |
| rs1449587  | 13 | 48311469  | T/C | LOC338099 | 0.38 | 0.34 | 6.26E-05 | 0.84 | OK                          | 0.36 | 0.37 | 0.54     | 1.03 | 0.36 | 0.37 | 0.04     | 0.95 |
| rs6599389  | 4  | 929113    | A/G | MGC4618   | 0.07 | 0.09 | 6.28E-05 | 1.31 | Non concordant              | NA   | NA   | NA       | NA   | NA   | NA   | NA       | NA   |
| rs265120   | 1  | 215659568 | C/T | GPATCH2   | 0.10 | 0.13 | 6.38E-05 | 1.31 | OK                          | 0.12 | 0.11 | 0.08     | 0.91 | 0.12 | 0.11 | 0.35     | 1.04 |
| rs1498046  | 4  | 126152922 | G/A | LOC729377 | 0.26 | 0.30 | 6.39E-05 | 1.18 | OK                          | 0.27 | 0.27 | 0.61     | 1.00 | 0.28 | 0.27 | 3.91E-03 | 1.07 |
| rs1396003  | 3  | 21331410  | T/C | VENTXP7   | 0.29 | 0.33 | 6.48E-05 | 1.19 | OK                          | 0.31 | 0.30 | 7.93E-03 | 0.91 | 0.31 | 0.30 | 0.60     | 1.01 |
| rs17690703 | 17 | 41281077  | T/C | IMP5      | 0.25 | 0.22 | 6.55E-05 | 0.83 | OK                          | 0.25 | 0.21 | 2.31E-08 | 0.80 | 0.21 | 0.25 | 9.45E-13 | 0.80 |
| rs3740484  | 10 | 102737353 | T/G | MRPL43    | 0.30 | 0.33 | 6.57E-05 | 1.20 | OK                          | 0.31 | 0.30 | 0.73     | 0.99 | 0.31 | 0.30 | 0.03     | 1.06 |
| rs7183808  | 15 | 96641692  | G/A | FLJ39743  | 0.36 | 0.40 | 6.61E-05 | 1.20 | OK                          | 0.37 | 0.36 | 0.05     | 0.94 | 0.37 | 0.37 | 0.45     | 1.03 |
| rs636508   | 9  | 83582101  | T/C | TLE1      | 0.25 | 0.21 | 6.65E-05 | 0.82 | OK                          | 0.23 | 0.24 | 0.09     | 1.08 | 0.23 | 0.24 | 0.22     | 0.97 |
| rs6812193  | 4  | 77418010  | T/C | STBD1     | 0.37 | 0.33 | 6.67E-05 | 0.86 | OK                          | 0.37 | 0.34 | 9.70E-04 | 0.91 | 0.34 | 0.37 | 4.20E-07 | 0.89 |
| rs9530494  | 13 | 75434275  | A/G | FLJ35379  | 0.28 | 0.25 | 6.82E-05 | 0.83 | OK                          | 0.27 | 0.26 | 0.19     | 0.96 | 0.26 | 0.28 | 2.81E-04 | 0.91 |
| rs6959225  | 7  | 8499029   | C/A | NXPH1     | 0.19 | 0.23 | 6.84E-05 | 1.24 | Non concordant              | NA   | NA   | NA       | NA   | NA   | NA   | NA       | NA   |
| rs8111509  | 19 | 57003307  | C/T | FPRL2     | 0.28 | 0.31 | 6.84E-05 | 1.19 | OK                          | 0.29 | 0.28 | 0.41     | 0.96 | 0.29 | 0.28 | 0.08     | 1.04 |
| rs7077361  | 10 | 15601549  | C/T | ITGA8     | 0.13 | 0.11 | 6.88E-05 | 0.77 | OK                          | 0.13 | 0.12 | 8.10E-03 | 0.88 | 0.11 | 0.13 | 5.40E-06 | 0.84 |
| rs9839984  | 3  | 162251606 | T/C | PPM1L     | 0.34 | 0.37 | 6.92E-05 | 1.19 | OK                          | 0.35 | 0.35 | 0.98     | 1.03 | 0.36 | 0.34 | 0.01     | 1.08 |
| rs4409766  | 10 | 104606653 | C/T | C10orf32  | 0.11 | 0.09 | 6.92E-05 | 0.77 | OK                          | 0.10 | 0.09 | 7.99E-03 | 0.87 | 0.09 | 0.11 | 9.92E-07 | 0.82 |
| rs2240914  | 9  | 131938127 | T/C | GPR107    | 0.05 | 0.07 | 6.98E-05 | 1.38 | OK                          | 0.06 | 0.06 | 0.94     | 0.99 | 0.06 | 0.06 | 0.03     | 1.11 |
| rs4661747  | 1  | 16612540  | A/G | SPATA21   | 0.33 | 0.29 | 7.02E-05 | 0.84 | OK                          | 0.33 | 0.32 | 0.70     | 0.97 | 0.31 | 0.33 | 7.67E-03 | 0.92 |
| rs4584384  | 1  | 152762321 | T/C | TDRD10    | 0.36 | 0.40 | 7.09E-05 | 1.19 | OK                          | 0.38 | 0.38 | 0.44     | 0.98 | 0.39 | 0.37 | 0.06     | 1.05 |
| rs807302   | 6  | 119968450 | C/A | LOC728727 | 0.24 | 0.21 | 7.25E-05 | 0.80 | OK                          | 0.22 | 0.23 | 0.14     | 1.07 | 0.23 | 0.23 | 0.17     | 0.96 |
| rs595046   | 21 | 43626445  | A/G | FLJ41733  | 0.30 | 0.34 | 7.27E-05 | 1.20 | OK                          | 0.32 | 0.31 | 0.82     | 1.00 | 0.32 | 0.31 | 0.02     | 1.07 |
| rs2686831  | 7  | 47959511  | T/C | PKD1L1    | 0.47 | 0.51 | 7.31E-05 | 1.17 | Bad cluster                 | NA   | NA   | NA       | NA   | NA   | NA   | NA       | NA   |
| rs6481928  | 10 | 35276450  | G/A | LOC646218 | 0.25 | 0.21 | 7.31E-05 | 0.82 | OK                          | 0.24 | 0.24 | 0.64     | 1.00 | 0.23 | 0.24 | 5.77E-03 | 0.93 |
| rs4242434  | 8  | 22557775  | T/G | BIN3      | 0.32 | 0.36 | 7.31E-05 | 1.20 | OK                          | 0.32 | 0.34 | 0.09     | 1.06 | 0.34 | 0.32 | 1.99E-04 | 1.11 |
| rs1580254  | 3  | 162249972 | T/C | PPM1L     | 0.34 | 0.37 | 7.35E-05 | 1.18 | OK                          | 0.35 | 0.35 | 1.00     | 1.03 | 0.36 | 0.34 | 0.02     | 1.08 |
| rs6582668  | 12 | 37052871  | A/G | ALG10B    | 0.12 | 0.15 | 7.41E-05 | 1.28 | OK                          | 0.14 | 0.13 | 0.40     | 0.97 | 0.14 | 0.13 | 0.08     | 1.08 |
| rs1526123  | 17 | 41139123  | G/A | C17orf69  | 0.47 | 0.43 | 7.52E-05 | 0.85 | OK                          | 0.47 | 0.44 | 4.47E-04 | 0.89 | 0.44 | 0.47 | 1.28E-07 | 0.88 |
| rs207521   | 21 | 24103584  | G/A | TUBAP     | 0.18 | 0.21 | 7.53E-05 | 1.24 | OK                          | 0.19 | 0.18 | 0.92     | 1.02 | 0.19 | 0.18 | 0.03     | 1.09 |
| rs12425761 | 12 | 114119258 | C/T | TBX3      | 0.10 | 0.12 | 7.75E-05 | 1.28 | OK                          | 0.11 | 0.10 | 0.11     | 0.90 | 0.11 | 0.10 | 0.33     | 1.02 |
| rs6780193  | 3  | 71988566  | G/A | PROK2     | 0.29 | 0.26 | 7.93E-05 | 0.83 | OK                          | 0.28 | 0.28 | 0.76     | 1.00 | 0.27 | 0.29 | 0.02     | 0.93 |
| rs16944593 | 12 | 113641262 | A/C | TBX3      | 0.09 | 0.07 | 7.95E-05 | 0.78 | OK                          | 0.10 | 0.09 | 0.15     | 0.92 | 0.08 | 0.10 | 6.08E-04 | 0.87 |
| rs11973020 | 7  | 25549191  | C/T | LOC646588 | 0.35 | 0.39 | 7.98E-05 | 1.18 | OK                          | 0.34 | 0.34 | 0.90     | 0.99 | 0.36 | 0.35 | 0.06     | 1.05 |
| rs417968   | 17 | 41084159  | C/T | C17orf69  | 0.26 | 0.22 | 8.03E-05 | 0.83 | OK                          | 0.25 | 0.22 | 4.53E-07 | 0.82 | 0.22 | 0.26 | 5.50E-11 | 0.82 |
| rs7436941  | 4  | 159654523 | G/A | RXFP1     | 0.15 | 0.18 | 8.13E-05 | 1.31 | OK                          | 0.17 | 0.16 | 0.08     | 0.94 | 0.17 | 0.16 | 0.30     | 1.07 |
| rs7911697  | 10 | 14525211  | A/G | FAM107B   | 0.30 | 0.34 | 8.19E-05 | 1.19 | OK                          | 0.32 | 0.32 | 0.89     | 0.99 | 0.33 | 0.31 | 0.02     | 1.06 |
| rs12255903 | 10 | 35269643  | T/C | LOC646218 | 0.25 | 0.21 | 8.26E-05 | 0.83 | OK                          | 0.24 | 0.24 | 0.64     | 1.00 | 0.23 | 0.24 | 5.97E-03 | 0.93 |
| rs7903802  | 10 | 12997566  | T/C | CCDC3     | 0.14 | 0.17 | 8.38E-05 | 1.24 | IMISS>0.1                   | NA   | NA   | NA       | NA   | NA   | NA   | NA       | NA   |
| rs9285433  | 6  | 119979004 | G/A | LOC728727 | 0.28 | 0.24 | 8.40E-05 | 0.82 | OK                          | 0.26 | 0.27 | 0.14     | 1.07 | 0.26 | 0.27 | 0.16     | 0.97 |
| rs699038   | 12 | 25050907  | C/T | LOC645177 | 0.49 | 0.45 | 8.53E-05 | 0.85 | OK                          | 0.48 | 0.47 | 0.16     | 0.96 | 0.47 | 0.49 | 2.81E-04 | 0.91 |
| rs7897198  | 10 | 35277737  | T/C | LOC646218 | 0.25 | 0.21 | 8.55E-05 | 0.82 | OK                          | 0.24 | 0.24 | 0.76     | 1.01 | 0.23 | 0.24 | 7.84E-03 | 0.94 |
| rs6446700  | 4  | 4962543   | G/A | LDHAL1    | 0.49 | 0.45 | 8.56E-05 | 0.85 | OK                          | 0.50 | 0.50 | 0.45     | 1.02 | 0.48 | 0.50 | 0.01     | 0.94 |
| rs2515501  | 8  | 6400033   | T/C | ANGPT2    | 0.15 | 0.12 | 8.85E-05 | 0.78 | OK                          | 0.14 | 0.14 | 0.95     | 0.99 | 0.13 | 0.14 | 7.88E-03 | 0.90 |
| rs7112698  | 11 | 129835261 | G/A | ADAMTS15  | 0.39 | 0.35 | 8.96E-05 | 0.85 | Non designable for Stage II | NA   | NA   | NA       | NA   | NA   | NA   | NA       | NA   |
| rs928939   | 12 | 11882934  | A/G | ETV6      | 0.10 | 0.13 | 9.02E-05 | 1.28 | OK                          | 0.11 | 0.11 | 0.71     | 1.02 | 0.12 | 0.11 | 0.01     | 1.10 |
| rs2387807  | 12 | 36733128  | A/G | LOC727847 | 0.08 | 0.10 | 9.12E-05 | 1.33 | OK                          | 0.08 | 0.08 | 0.67     | 0.97 | 0.09 | 0.08 | 0.09     | 1.08 |
| rs2794256  | 6  | 119985100 | T/C | LOC728727 | 0.28 | 0.24 | 9.17E-05 | 0.82 | OK                          | 0.26 | 0.27 | 0.28     | 1.06 | 0.26 | 0.27 | 0.07     | 0.96 |
| rs935920   | 2  | 35985642  | G/T | MRPL50P1  | 0.36 | 0.33 | 9.24E-05 | 0.84 | OK                          | 0.35 | 0.34 | 0.03     | 0.94 | 0.17 | 0.15 | 6.65E-04 | 1.13 |
| rs9480154  | 6  | 150652308 | A/G | RNU4P1    | 0.06 | 0.08 | 9.25E-05 | 1.43 | OK                          | 0.06 | 0.06 | 0.28     | 0.94 | 0.06 | 0.06 | 0.22     | 1.08 |
| rs7559362  | 2  | 196027545 | G/A | LOC391470 | 0.43 | 0.47 | 9.26E-05 | 1.18 | OK                          | 0.45 | 0.44 | 0.43     | 0.97 | 0.45 | 0.44 | 0.06     | 1.05 |
| rs2470179  | 15 | 49471703  | C/T | GLDN      | 0.39 | 0.43 | 9.27E-05 | 1.17 | Non designable for Stage II | NA   | NA   | NA       | NA   | NA   | NA   | NA       | NA   |
| rs12777747 | 10 | 123989646 | G/A | TACC2     | 0.19 | 0.23 | 9.30E-05 | 1.21 | OK                          | 0.20 | 0.21 | 0.10     | 1.07 | 0.21 | 0.20 | 3.88E-04 | 1.11 |
| rs1224671  | 15 | 45682835  | A/G | SEMA6D    | 0.30 | 0.33 | 9.32E-05 | 1.19 | OK                          | 0.31 | 0.29 | 0.09     | 0.94 | 0.31 | 0.30 | 0.37     | 1.03 |
| rs2708851  | 7  | 48052327  | C/T | LOC136288 | 0.49 | 0.53 | 9.33E-05 | 1.17 | OK                          | 0.50 | 0.50 | 0.57     | 1.02 | 0.51 | 0.49 | 0.04     | 1.05 |
| rs8014371  | 14 | 32579884  | C/A | NPAS3     | 0.34 | 0.37 | 9.34E-05 | 1.19 | OK                          | 0.36 | 0.35 | 0.33     | 0.98 | 0.36 | 0.35 | 0.07     | 1.06 |
| rs1605527  | 3  | 21351855  | T/C | VENTXP7   | 0.07 | 0.09 | 9.41E-05 | 1.30 | OK                          | 0.07 | 0.07 | 0.71     | 0.97 | 0.08 | 0.07 | 0.06     | 1.07 |
| rs6440096  | 3  | 143814050 | G/A | PLS1      | 0.17 | 0.14 | 9.52E-05 | 0.79 | OK                          | 0.16 | 0.15 | 0.15     | 0.94 | 0.15 | 0.16 | 3.26E-04 | 0.88 |
| rs7485262  | 12 | 37088013  | C/T | ALG10B    | 0.08 | 0.11 | 9.54E-05 | 1.32 | OK                          | 0.10 | 0.09 | 0.27     | 0.94 | 0.10 | 0.09 | 0.11     | 1.07 |
| rs13264187 | 8  | 22562043  | T/C | BIN3      | 0.32 | 0.36 | 9.55E-05 | 1.20 | OK                          | 0.32 | 0.33 | 0.11     | 1.05 | 0.34 | 0.32 | 5.48E-04 | 1.10 |
| rs560271   | 17 | 64870692  | A/G | ABCA5     | 0.16 | 0.14 | 9.60E-05 | 0.77 | Non designable for Stage II | NA   | NA   | NA       | NA   | NA   | NA   | NA       | NA   |
| rs748088   | 21 | 38320720  | G/A | DSCR4     | 0.43 | 0.39 | 9.66E-05 | 0.86 | OK                          | 0.41 | 0.43 | 0.02     | 1.08 | 0.42 | 0.42 | 0.62     | 0.99 |
| rs6596287  | 5  | 135507247 | C/A | SMAD5     | 0.28 | 0.31 | 9.72E-05 | 1.21 | OK                          | 0.29 | 0.28 | 0.19     | 0.96 | 0.29 | 0.28 | 0.18     | 1.05 |
| rs9544996  | 13 | 78590677  | A/G | RBM26     | 0.43 | 0.39 | 9.82E-05 | 0.85 | OK                          | 0.42 | 0.43 | 0.19     | 1.05 | 0.42 | 0.43 | 0.19     | 0.97 |
| rs7655536  | 4  | 77395792  | C/T | SCARB2    | 0.19 | 0.22 | 9.86E-05 | 1.20 | IMISS>0.1                   | NA   | NA   | NA       | NA   | NA   | NA   | NA       | NA   |
| rs662616   | 13 | 78593828  | G/A | RBM26     | 0.08 | 0.10 | 1.01E-04 | 1.33 | OK                          | 0.08 | 0.08 | 0.54     | 0.98 | 0.08 | 0.08 | 0.0      |      |

|            |    |           |     |              |      |      |          |      |                             |      |      |          |      |      |      |          |      |
|------------|----|-----------|-----|--------------|------|------|----------|------|-----------------------------|------|------|----------|------|------|------|----------|------|
| rs10122587 | 9  | 2681951   | T/C | KCNV2        | 0.26 | 0.30 | 1.02E-04 | 1.20 | OK                          | 0.28 | 0.27 | 0.38     | 0.97 | 0.28 | 0.27 | 0.09     | 1.05 |
| rs999826   | 5  | 67311112  | T/C | LOC643631    | 0.23 | 0.20 | 1.03E-04 | 0.85 | OK                          | 0.22 | 0.22 | 0.48     | 1.03 | 0.22 | 0.23 | 0.05     | 0.96 |
| rs11100188 | 4  | 159655208 | T/G | RXFP1        | 0.15 | 0.18 | 1.03E-04 | 1.31 | OK                          | 0.17 | 0.16 | 0.07     | 0.94 | 0.17 | 0.16 | 0.31     | 1.07 |
| rs7225002  | 17 | 41544850  | G/A | KIAA1267     | 0.40 | 0.36 | 1.03E-04 | 0.85 | OK                          | 0.38 | 0.36 | 5.80E-04 | 0.89 | 0.36 | 0.39 | 8.40E-08 | 0.87 |
| rs2168330  | 8  | 52111821  | A/G | SNTG1        | 0.30 | 0.34 | 1.05E-04 | 1.18 | IMISS>0.1                   | NA   | NA   | NA       | NA   | NA   | NA   | NA       | NA   |
| rs11136568 | 8  | 2922585   | T/C | CSMD1        | 0.40 | 0.44 | 1.05E-04 | 1.18 | OK                          | 0.42 | 0.42 | 0.35     | 0.96 | 0.42 | 0.41 | 0.10     | 1.04 |
| rs1542384  | 4  | 159664766 | C/T | RXFP1        | 0.34 | 0.37 | 1.07E-04 | 1.20 | OK                          | 0.35 | 0.34 | 0.59     | 0.98 | 0.35 | 0.34 | 0.06     | 1.06 |
| rs2000731  | 18 | 46150625  | A/G | C18orf24     | 0.34 | 0.38 | 1.07E-04 | 1.18 | OK                          | 0.36 | 0.36 | 0.75     | 1.01 | 0.37 | 0.35 | 6.29E-03 | 1.08 |
| rs305163   | 2  | 36221313  | A/G | CRIM1        | 0.25 | 0.29 | 1.07E-04 | 1.19 | Non concordant              | NA   | NA   | NA       | NA   | NA   | NA   | NA       | NA   |
| rs3759407  | 12 | 46481336  | T/C | HDAC7A       | 0.06 | 0.08 | 1.07E-04 | 1.38 | OK                          | 0.07 | 0.08 | 0.19     | 1.12 | 0.08 | 0.07 | 4.24E-04 | 1.22 |
| rs12460684 | 19 | 1624793   | G/A | TCF3         | 0.43 | 0.47 | 1.08E-04 | 1.18 | Non concordant              | NA   | NA   | NA       | NA   | NA   | NA   | NA       | NA   |
| rs12412945 | 10 | 54468113  | T/C | MBL2         | 0.19 | 0.16 | 1.09E-04 | 0.80 | OK                          | 0.17 | 0.17 | 0.72     | 1.03 | 0.16 | 0.18 | 0.01     | 0.92 |
| rs10064163 | 5  | 112007605 | G/T | APC          | 0.40 | 0.44 | 1.11E-04 | 1.18 | OK                          | 0.41 | 0.41 | 0.91     | 1.01 | 0.42 | 0.40 | 0.03     | 1.07 |
| rs7224296  | 17 | 42155230  | G/A | LOC644315    | 0.27 | 0.24 | 1.13E-04 | 0.84 | OK                          | 0.27 | 0.24 | 3.35E-05 | 0.86 | 0.24 | 0.27 | 1.32E-08 | 0.85 |
| rs1036745  | 13 | 78499702  | C/T | LOC390415    | 0.06 | 0.08 | 1.13E-04 | 1.35 | OK                          | 0.07 | 0.07 | 0.83     | 1.00 | 0.07 | 0.07 | 0.05     | 1.11 |
| rs11128994 | 3  | 21195185  | G/A | VENTXP7      | 0.25 | 0.22 | 1.15E-04 | 0.85 | OK                          | 0.23 | 0.24 | 0.03     | 1.08 | 0.23 | 0.24 | 0.37     | 0.98 |
| rs836109   | 11 | 34526784  | C/A | LOC729710    | 0.12 | 0.15 | 1.16E-04 | 1.30 | OK                          | 0.13 | 0.13 | 0.95     | 1.00 | 0.14 | 0.13 | 0.02     | 1.10 |
| rs11747238 | 5  | 4831369   | G/A | LOC340094    | 0.21 | 0.24 | 1.16E-04 | 1.21 | OK                          | 0.22 | 0.22 | 0.41     | 0.95 | 0.23 | 0.22 | 0.07     | 1.05 |
| rs4789632  | 17 | 69702146  | T/C | RPL38        | 0.42 | 0.46 | 1.16E-04 | 1.17 | OK                          | 0.43 | 0.42 | 0.14     | 0.95 | 0.44 | 0.43 | 0.27     | 1.03 |
| rs4823506  | 22 | 46643740  | A/G | RP11-191L9.1 | 0.41 | 0.37 | 1.16E-04 | 0.85 | OK                          | 0.41 | 0.40 | 0.49     | 0.98 | 0.39 | 0.41 | 6.00E-03 | 0.93 |
| rs6481654  | 10 | 30401130  | G/A | KIAA1462     | 0.24 | 0.27 | 1.16E-04 | 1.19 | OK                          | 0.26 | 0.25 | 0.15     | 0.95 | 0.26 | 0.25 | 0.18     | 1.04 |
| rs4142010  | 1  | 39938607  | T/C | HPCAL4       | 0.10 | 0.12 | 1.16E-04 | 1.28 | OK                          | 0.10 | 0.11 | 0.26     | 1.10 | 0.11 | 0.10 | 2.63E-03 | 1.15 |
| rs706858   | 6  | 120079876 | G/A | LOC728727    | 0.43 | 0.39 | 1.17E-04 | 0.85 | OK                          | 0.41 | 0.41 | 0.53     | 1.03 | 0.40 | 0.42 | 0.06     | 0.96 |
| rs11217299 | 11 | 98250101  | A/G | CNTN5        | 0.35 | 0.31 | 1.17E-04 | 0.84 | OK                          | 0.34 | 0.34 | 0.49     | 1.02 | 0.33 | 0.34 | 0.06     | 0.95 |
| rs11185726 | 9  | 136240925 | C/T | RXRA         | 0.14 | 0.17 | 1.18E-04 | 1.27 | OK                          | 0.15 | 0.15 | 0.28     | 1.04 | 0.16 | 0.14 | 1.68E-03 | 1.12 |
| rs10044636 | 5  | 150714711 | A/C | SLC36A2      | 0.17 | 0.20 | 1.20E-04 | 1.23 | OK                          | 0.18 | 0.17 | 0.36     | 0.96 | 0.18 | 0.18 | 0.19     | 1.05 |
| rs12361904 | 11 | 127208320 | G/A | LOC387820    | 0.14 | 0.17 | 1.20E-04 | 1.28 | OK                          | 0.15 | 0.15 | 0.76     | 1.01 | 0.16 | 0.14 | 0.01     | 1.10 |
| rs4508240  | 12 | 37186069  | G/A | CPNE8        | 0.12 | 0.15 | 1.21E-04 | 1.27 | OK                          | 0.13 | 0.13 | 0.49     | 0.97 | 0.14 | 0.13 | 0.07     | 1.08 |
| rs10515822 | 5  | 160512672 | A/G | GABRB2       | 0.07 | 0.09 | 1.22E-04 | 1.27 | OK                          | 0.09 | 0.08 | 0.56     | 0.98 | 0.09 | 0.08 | 0.09     | 1.07 |
| rs2686830  | 7  | 47957563  | A/G | PKD1L1       | 0.47 | 0.51 | 1.23E-04 | 1.17 | OK                          | 0.49 | 0.49 | 0.65     | 0.99 | 0.50 | 0.48 | 0.04     | 1.05 |
| rs11708730 | 3  | 72008678  | C/T | PROK2        | 0.27 | 0.24 | 1.23E-04 | 0.83 | OK                          | 0.25 | 0.25 | 0.86     | 0.98 | 0.25 | 0.26 | 6.14E-03 | 0.92 |
| rs974627   | 12 | 37205791  | T/C | CPNE8        | 0.12 | 0.15 | 1.24E-04 | 1.27 | OK                          | 0.13 | 0.13 | 0.44     | 0.97 | 0.14 | 0.13 | 0.08     | 1.07 |
| rs727549   | 7  | 83065910  | G/A | SEMA3E       | 0.21 | 0.25 | 1.25E-04 | 1.19 | OK                          | 0.22 | 0.22 | 0.40     | 0.97 | 0.23 | 0.22 | 0.12     | 1.05 |
| rs37391    | 5  | 123553864 | G/A | ZNF608       | 0.33 | 0.30 | 1.27E-04 | 0.86 | OK                          | 0.32 | 0.31 | 0.74     | 1.00 | 0.31 | 0.32 | 5.28E-03 | 0.94 |
| rs10839984 | 11 | 8137470   | G/A | RIC3         | 0.25 | 0.21 | 1.27E-04 | 0.82 | OK                          | 0.23 | 0.24 | 0.84     | 1.00 | 0.23 | 0.24 | 0.02     | 0.92 |
| rs1639304  | 7  | 83017558  | G/A | SEMA3E       | 0.21 | 0.25 | 1.27E-04 | 1.19 | OK                          | 0.23 | 0.22 | 0.18     | 0.95 | 0.23 | 0.22 | 0.24     | 1.04 |
| rs1693389  | 7  | 83014198  | C/T | SEMA3E       | 0.21 | 0.25 | 1.27E-04 | 1.19 | OK                          | 0.23 | 0.22 | 0.22     | 0.96 | 0.23 | 0.22 | 0.18     | 1.04 |
| rs6532197  | 4  | 91016324  | G/A | MMRN1        | 0.07 | 0.09 | 1.28E-04 | 1.39 | OK                          | 0.07 | 0.09 | 4.19E-04 | 1.28 | 0.09 | 0.07 | 1.10E-07 | 1.32 |
| rs10136071 | 14 | 32580195  | T/G | NPAS3        | 0.35 | 0.39 | 1.32E-04 | 1.18 | OK                          | 0.38 | 0.36 | 0.10     | 0.95 | 0.37 | 0.37 | 0.21     | 1.04 |
| rs2949065  | 2  | 36044594  | C/T | MRPL50P1     | 0.37 | 0.33 | 1.32E-04 | 0.84 | OK                          | 0.35 | 0.34 | 0.04     | 0.94 | 0.33 | 0.36 | 3.61E-05 | 0.90 |
| rs934397   | 2  | 237371678 | T/C | CXCR7        | 0.23 | 0.19 | 1.32E-04 | 0.83 | OK                          | 0.21 | 0.22 | 0.11     | 1.06 | 0.21 | 0.22 | 0.27     | 0.97 |
| rs4478801  | 1  | 152731196 | G/A | SHE          | 0.37 | 0.40 | 1.33E-04 | 1.18 | OK                          | 0.38 | 0.38 | 0.49     | 0.98 | 0.39 | 0.38 | 0.07     | 1.05 |
| rs9924308  | 16 | 30062241  | A/G | MAPK3        | 0.48 | 0.44 | 1.34E-04 | 0.86 | OK                          | 0.46 | 0.46 | 0.81     | 1.01 | 0.45 | 0.47 | 0.01     | 0.94 |
| rs972427   | 3  | 21339149  | T/C | VENTXP7      | 0.29 | 0.32 | 1.35E-04 | 1.18 | OK                          | 0.32 | 0.29 | 2.35E-03 | 0.89 | 0.30 | 0.30 | 0.81     | 1.00 |
| rs2681051  | 7  | 11615690  | A/G | KIAA0960     | 0.30 | 0.26 | 1.35E-04 | 0.83 | OK                          | 0.28 | 0.29 | 0.31     | 1.04 | 0.28 | 0.29 | 0.12     | 0.96 |
| rs8078967  | 17 | 41363929  | T/C | MAPT         | 0.43 | 0.47 | 1.36E-04 | 1.17 | OK                          | 0.45 | 0.45 | 0.74     | 1.01 | 0.46 | 0.44 | 6.65E-03 | 1.07 |
| rs7900480  | 10 | 35378705  | A/G | CUL2         | 0.33 | 0.37 | 1.37E-04 | 1.19 | OK                          | 0.35 | 0.34 | 0.21     | 0.96 | 0.35 | 0.34 | 0.13     | 1.05 |
| rs8034843  | 15 | 55368601  | A/G | TCF12        | 0.17 | 0.20 | 1.37E-04 | 1.19 | OK                          | 0.18 | 0.18 | 0.98     | 1.00 | 0.19 | 0.18 | 0.02     | 1.07 |
| rs12118128 | 1  | 221904876 | C/T | LOC388743    | 0.07 | 0.10 | 1.37E-04 | 1.32 | OK                          | 0.09 | 0.08 | 0.16     | 0.92 | 0.09 | 0.08 | 0.21     | 1.06 |
| rs643786   | 19 | 55547761  | A/C | NAPSA        | 0.24 | 0.28 | 1.38E-04 | 1.21 | OK                          | 0.26 | 0.26 | 0.39     | 0.98 | 0.26 | 0.25 | 0.08     | 1.07 |
| rs922687   | 15 | 71635861  | A/C | NPTN         | 0.44 | 0.48 | 1.39E-04 | 1.17 | OK                          | 0.45 | 0.47 | 0.01     | 1.08 | 0.47 | 0.45 | 1.42E-05 | 1.12 |
| rs11082819 | 18 | 46144485  | C/T | C18orf24     | 0.34 | 0.37 | 1.41E-04 | 1.18 | OK                          | 0.36 | 0.36 | 0.64     | 1.02 | 0.36 | 0.35 | 4.88E-03 | 1.08 |
| rs4697508  | 4  | 24576450  | C/A | DKFZp761B107 | 0.23 | 0.26 | 1.42E-04 | 1.22 | OK                          | 0.24 | 0.25 | 0.24     | 1.03 | 0.25 | 0.24 | 6.17E-04 | 1.10 |
| rs11595185 | 10 | 25231376  | G/A | PRTFDC1      | 0.32 | 0.28 | 1.43E-04 | 0.84 | OK                          | 0.31 | 0.30 | 0.02     | 0.93 | 0.29 | 0.32 | 1.93E-05 | 0.89 |
| rs11107270 | 12 | 92834257  | G/A | CRADD        | 0.06 | 0.04 | 1.44E-04 | 0.70 | MAF<0.05                    | NA   | NA   | NA       | NA   | NA   | NA   | NA       | NA   |
| rs1430961  | 4  | 90771943  | C/T | SNCA         | 0.07 | 0.09 | 1.45E-04 | 1.34 | OK                          | 0.08 | 0.09 | 0.01     | 1.13 | 0.09 | 0.08 | 5.92E-06 | 1.21 |
| rs1353615  | 7  | 83013723  | A/C | SEMA3E       | 0.21 | 0.25 | 1.47E-04 | 1.19 | OK                          | 0.23 | 0.22 | 0.16     | 0.95 | 0.23 | 0.22 | 0.27     | 1.03 |
| rs1950712  | 14 | 68550317  | G/A | RPS29P1      | 0.08 | 0.06 | 1.47E-04 | 0.75 | OK                          | 0.08 | 0.07 | 0.59     | 0.95 | 0.07 | 0.08 | 3.23E-03 | 0.86 |
| rs11852946 | 15 | 36975713  | C/A | FLJ35695     | 0.10 | 0.13 | 1.48E-04 | 1.30 | Non designable for Stage II | NA   | NA   | NA       | NA   | NA   | NA   | NA       | NA   |
| rs6473485  | 8  | 51979283  | C/T | SNTG1        | 0.31 | 0.35 | 1.50E-04 | 1.17 | OK                          | 0.31 | 0.30 | 0.76     | 0.99 | 0.32 | 0.31 | 0.08     | 1.05 |
| rs11656130 | 17 | 64912041  | G/T | MAP2K6       | 0.45 | 0.41 | 1.50E-04 | 0.85 | OK                          | 0.45 | 0.45 | 0.83     | 1.01 | 0.44 | 0.45 | 0.05     | 0.95 |
| rs1035833  | 2  | 230417442 | C/T | TRIP12       | 0.28 | 0.32 | 1.52E-04 | 1.19 | OK                          | 0.30 | 0.30 | 0.81     | 1.00 | 0.30 | 0.29 | 0.03     | 1.07 |
| rs4789636  | 17 | 69710434  | T/C | RPL38        | 0.47 | 0.43 | 1.52E-04 | 0.86 | OK                          | 0.45 | 0.45 | 0.77     | 1.01 | 0.44 | 0.46 | 0.02     | 0.95 |
| rs7589111  | 2  | 131887358 | A/G | LOC389043    | 0.35 | 0.39 | 1.53E-04 | 1.18 | Bad cluster                 | NA   | NA   | NA       | NA   | NA   | NA   | NA       | NA   |
| rs16925839 | 10 | 70277867  | T/C | STOX1        | 0.48 | 0.52 | 1.53E-04 | 1.16 | OK                          | 0.49 | 0.48 | 0.40     | 0.97 | 0.50 | 0.49 | 0.10     | 1.04 |
| rs12714369 | 2  | 3041245   | A/G | LOC729897    | 0.50 | 0.47 | 1.56E-04 | 0.86 | OK                          | 0.48 | 0.50 | 0.03     | 1.07 | 0.49 | 0.49 | 0.47     | 0.98 |
| rs4742236  | 9  | 676753    | A/G | ANKRD15      | 0.14 | 0.17 | 1.56E-04 | 1.25 | OK                          | 0.15 | 0.15 | 0.12     | 1.09 | 0.16 | 0.14 | 4.88E-04 | 1.14 |
| rs11222109 | 11 | 129841446 | A/G | ADAMTS15     | 0.46 | 0.50 | 1.57E-04 | 1.17 | OK                          | 0.47 | 0.47 | 0.98     | 1.00 | 0.48 | 0.47 | 0.02     | 1.06 |





|            |    |           |     |                     |      |      |          |      |                     |      |      |          |      |      |      |          |      |      |
|------------|----|-----------|-----|---------------------|------|------|----------|------|---------------------|------|------|----------|------|------|------|----------|------|------|
| rs903056   | 3  | 14785294  | G/A | <i>C3orf20</i>      | 0.45 | 0.49 | 2.18E-04 | 1.17 | concordant          | NA   | NA   | NA       | NA   | NA   | NA   | NA       | NA   |      |
| rs880183   | 19 | 2000314   | A/G | <i>MKMK2</i>        | 0.26 | 0.29 | 2.19E-04 | 1.19 | Bad cluster         | OK   | 0.28 | 0.28     | 0.59 | 0.98 | 0.28 | 0.27     | 0.04 | 1.06 |
| rs1491923  | 12 | 38877384  | C/T | <i>LRRK2</i>        | 0.31 | 0.34 | 2.20E-04 | 1.20 | OK                  | 0.31 | 0.33 | 0.01     | 1.10 | 0.33 | 0.31 | 1.55E-05 | 1.14 |      |
| rs2487707  | 10 | 70435098  | T/G | <i>KIAA1279</i>     | 0.49 | 0.46 | 2.24E-04 | 0.86 | OK                  | 0.48 | 0.48 | 0.96     | 1.00 | 0.47 | 0.49 | 0.02     | 0.94 |      |
| rs264122   | 5  | 129675680 | T/C | <i>CHSY-2</i>       | 0.32 | 0.35 | 2.25E-04 | 1.17 | OK                  | 0.32 | 0.33 | 0.55     | 1.02 | 0.34 | 0.32 | 6.81E-03 | 1.08 |      |
| rs1223271  | 20 | 13244912  | A/G | <i>C20orf82</i>     | 0.15 | 0.12 | 2.28E-04 | 0.81 | OK                  | 0.14 | 0.13 | 0.01     | 0.89 | 0.13 | 0.15 | 4.85E-06 | 0.85 |      |
| rs11248060 | 4  | 954359    | T/C | <i>DGKQ</i>         | 0.12 | 0.14 | 2.28E-04 | 1.24 | OK                  | 0.12 | 0.13 | 0.07     | 1.10 | 0.13 | 0.12 | 4.03E-04 | 1.14 |      |
| rs6800015  | 3  | 180262240 | C/T | <i>ZMAT3</i>        | 0.26 | 0.23 | 2.30E-04 | 0.83 | OK                  | 0.26 | 0.25 | 0.50     | 0.96 | 0.24 | 0.26 | 5.31E-03 | 0.91 |      |
| rs17275640 | 1  | 176155379 | T/C | <i>SEC16B</i>       | 0.13 | 0.16 | 2.31E-04 | 1.22 | Bad cluster         | NA   | NA   | NA       | NA   | NA   | NA   | NA       | NA   |      |
| rs2169166  | 8  | 105999385 | A/G | <i>LOC644103</i>    | 0.31 | 0.27 | 2.33E-04 | 0.84 | OK                  | 0.29 | 0.29 | 0.91     | 0.99 | 0.29 | 0.30 | 0.01     | 0.93 |      |
| rs7666265  | 4  | 77395305  | A/G | <i>SCARB2</i>       | 0.19 | 0.22 | 2.33E-04 | 1.19 | OK                  | 0.19 | 0.20 | 0.07     | 1.05 | 0.21 | 0.19 | 5.52E-04 | 1.09 |      |
| rs2586469  | 17 | 45682246  | C/T | <i>LOC729160</i>    | 0.22 | 0.19 | 2.35E-04 | 0.83 | OK                  | 0.22 | 0.21 | 0.12     | 0.94 | 0.20 | 0.22 | 5.25E-04 | 0.90 |      |
| rs6903627  | 6  | 120169406 | T/C | <i>LOC728727</i>    | 0.16 | 0.19 | 2.36E-04 | 1.21 | OK                  | 0.17 | 0.17 | 0.79     | 1.00 | 0.18 | 0.17 | 0.05     | 1.07 |      |
| rs4517741  | 15 | 90711310  | G/A | <i>ST8SIA2</i>      | 0.14 | 0.16 | 2.37E-04 | 1.21 | OK                  | 0.15 | 0.14 | 0.53     | 0.96 | 0.15 | 0.14 | 0.09     | 1.05 |      |
| rs7920137  | 10 | 73806703  | G/A | <i>CBARA1</i>       | 0.41 | 0.44 | 2.38E-04 | 1.15 | OK                  | 0.42 | 0.43 | 0.28     | 1.04 | 0.43 | 0.41 | 1.96E-03 | 1.08 |      |
| rs10765137 | 10 | 129278636 | C/T | <i>DOCK1</i>        | 0.40 | 0.36 | 2.39E-04 | 0.86 | OK                  | 0.40 | 0.39 | 0.60     | 0.98 | 0.38 | 0.40 | 0.01     | 0.94 |      |
| rs9377145  | 6  | 148961594 | C/T | <i>SASH1</i>        | 0.18 | 0.21 | 2.41E-04 | 1.22 | OK                  | 0.19 | 0.19 | 0.80     | 1.02 | 0.20 | 0.19 | 9.94E-03 | 1.10 |      |
| rs2962101  | 5  | 35171498  | C/T | <i>PRLR</i>         | 0.11 | 0.13 | 2.43E-04 | 1.28 | OK                  | 0.11 | 0.11 | 0.27     | 0.94 | 0.11 | 0.11 | 0.26     | 1.05 |      |
| rs11766212 | 7  | 47910478  | T/C | <i>PKD1L1</i>       | 0.38 | 0.35 | 2.43E-04 | 0.86 | IMISS>0.1           | NA   | NA   | NA       | NA   | NA   | NA   | NA       | NA   |      |
| rs9299039  | 9  | 680460    | T/C | <i>ANKRD15</i>      | 0.25 | 0.22 | 2.44E-04 | 0.84 | OK                  | 0.23 | 0.22 | 0.26     | 0.95 | 0.22 | 0.24 | 4.12E-04 | 0.89 |      |
| rs473532   | 2  | 165021032 | A/G | <i>GRB14</i>        | 0.33 | 0.37 | 2.44E-04 | 1.17 | OK                  | 0.34 | 0.34 | 0.73     | 0.99 | 0.35 | 0.34 | 0.05     | 1.05 |      |
| rs1369642  | 15 | 45692185  | G/A | <i>SEMA6D</i>       | 0.34 | 0.38 | 2.44E-04 | 1.17 | OK                  | 0.35 | 0.34 | 0.07     | 0.93 | 0.35 | 0.35 | 0.48     | 1.01 |      |
| rs2512139  | 11 | 117320774 | A/G | <i>TMPRSS13</i>     | 0.38 | 0.34 | 2.45E-04 | 0.86 | OK                  | 0.37 | 0.38 | 0.67     | 1.02 | 0.36 | 0.38 | 0.08     | 0.96 |      |
| rs13437473 | 6  | 72711578  | T/C | <i>RIMS1</i>        | 0.07 | 0.09 | 2.46E-04 | 1.29 | OK                  | 0.08 | 0.08 | 0.69     | 1.02 | 0.09 | 0.08 | 0.01     | 1.11 |      |
| rs356229   | 4  | 90825620  | G/A | <i>SNCA</i>         | 0.36 | 0.40 | 2.46E-04 | 1.16 | OK                  | 0.36 | 0.40 | 2.59E-06 | 1.17 | 0.40 | 0.36 | 2.28E-09 | 1.17 |      |
| rs7671488  | 4  | 122618788 | C/T | <i>LOC729112</i>    | 0.46 | 0.43 | 2.49E-04 | 0.86 | OK                  | 0.45 | 0.46 | 0.25     | 1.04 | 0.45 | 0.46 | 0.17     | 0.97 |      |
| rs398293   | 9  | 118023823 | A/C | <i>PAPPA</i>        | 0.39 | 0.43 | 2.49E-04 | 1.16 | OK                  | 0.41 | 0.40 | 0.85     | 1.00 | 0.41 | 0.40 | 0.04     | 1.06 |      |
| rs9846960  | 3  | 143790760 | G/A | <i>ATR</i>          | 0.42 | 0.46 | 2.50E-04 | 1.17 | OK                  | 0.43 | 0.43 | 0.86     | 1.00 | 0.44 | 0.43 | 0.02     | 1.06 |      |
| rs10520381 | 4  | 178769035 | A/G | <i>LOC285500</i>    | 0.18 | 0.15 | 2.52E-04 | 0.82 | OK                  | 0.18 | 0.18 | 0.75     | 0.98 | 0.17 | 0.18 | 0.01     | 0.91 |      |
| rs2051569  | 22 | 31355180  | A/C | <i>SYN3</i>         | 0.30 | 0.34 | 2.52E-04 | 1.17 | OK                  | 0.32 | 0.31 | 0.12     | 0.95 | 0.32 | 0.31 | 0.30     | 1.03 |      |
| rs9593152  | 13 | 75495388  | G/A | <i>FLJ35379</i>     | 0.29 | 0.33 | 2.52E-04 | 1.15 | OK                  | 0.30 | 0.30 | 0.71     | 0.99 | 0.31 | 0.30 | 0.05     | 1.05 |      |
| rs2616510  | 8  | 89087241  | C/A | <i>MMP16</i>        | 0.19 | 0.22 | 2.53E-04 | 1.26 | OK                  | 0.20 | 0.21 | 0.14     | 1.05 | 0.22 | 0.20 | 5.79E-04 | 1.12 |      |
| rs7625872  | 3  | 45132572  | A/C | <i>CDCP1</i>        | 0.15 | 0.12 | 2.54E-04 | 0.82 | OK                  | 0.13 | 0.13 | 0.86     | 1.02 | 0.13 | 0.14 | 5.37E-03 | 0.93 |      |
| rs4769388  | 13 | 24393134  | A/G | <i>CENPJ</i>        | 0.31 | 0.28 | 2.55E-04 | 0.85 | OK                  | 0.31 | 0.31 | 0.96     | 1.02 | 0.30 | 0.31 | 0.03     | 0.95 |      |
| rs4505777  | 4  | 164419696 | G/A | <i>LOC133332</i>    | 0.18 | 0.15 | 2.60E-04 | 0.82 | OK                  | 0.17 | 0.17 | 0.78     | 1.00 | 0.16 | 0.17 | 0.03     | 0.92 |      |
| rs6427069  | 1  | 165391458 | C/T | <i>LOC391130</i>    | 0.39 | 0.35 | 2.60E-04 | 0.86 | OK                  | 0.37 | 0.37 | 0.83     | 1.02 | 0.36 | 0.38 | 0.03     | 0.95 |      |
| rs207465   | 21 | 24120442  | G/T | <i>TUBAP</i>        | 0.35 | 0.39 | 2.60E-04 | 1.17 | IMISS>0.1           | NA   | NA   | NA       | NA   | NA   | NA   | NA       | NA   |      |
| rs16959883 | 15 | 45698555  | T/C | <i>SEMA6D</i>       | 0.30 | 0.33 | 2.60E-04 | 1.18 | OK                  | 0.31 | 0.29 | 0.07     | 0.93 | 0.31 | 0.30 | 0.48     | 1.02 |      |
| rs1881925  | 3  | 110444079 | C/T | <i>DPPA2</i>        | 0.47 | 0.51 | 2.62E-04 | 1.16 | OK                  | 0.49 | 0.48 | 0.06     | 0.94 | 0.49 | 0.48 | 0.42     | 1.02 |      |
| rs1484127  | 8  | 51888207  | A/G | <i>SNTG1</i>        | 0.32 | 0.35 | 2.63E-04 | 1.17 | OK                  | 0.32 | 0.31 | 0.85     | 0.99 | 0.33 | 0.32 | 0.07     | 1.04 |      |
| rs13192471 | 6  | 32779081  | C/T | <i>HLA-DQB1</i>     | 0.14 | 0.16 | 2.65E-04 | 1.22 | OK                  | 0.14 | 0.14 | 0.83     | 1.02 | 0.15 | 0.14 | 0.02     | 1.09 |      |
| rs1613367  | 11 | 104416241 | G/T | <i>COPI</i>         | 0.40 | 0.44 | 2.65E-04 | 1.16 | IMISS>0.1           | NA   | NA   | NA       | NA   | NA   | NA   | NA       | NA   |      |
| rs26286    | 5  | 14219402  | T/G | <i>TRIO</i>         | 0.45 | 0.49 | 2.67E-04 | 1.16 | OK                  | 0.47 | 0.49 | 0.04     | 1.07 | 0.49 | 0.46 | 5.38E-05 | 1.11 |      |
| rs11136092 | 8  | 22522433  | G/T | <i>KIAA1967</i>     | 0.32 | 0.36 | 2.68E-04 | 1.18 | OK                  | 0.33 | 0.34 | 0.14     | 1.05 | 0.35 | 0.33 | 8.06E-04 | 1.10 |      |
| rs996243   | 6  | 137895153 | A/C | <i>LOC391040</i>    | 0.26 | 0.22 | 2.68E-04 | 0.85 | OK                  | 0.26 | 0.25 | 0.09     | 0.94 | 0.24 | 0.26 | 6.53E-04 | 0.91 |      |
| rs7094852  | 10 | 129223387 | C/T | <i>DOCK1</i>        | 0.25 | 0.28 | 2.69E-04 | 1.19 | OK                  | 0.26 | 0.27 | 0.24     | 1.07 | 0.27 | 0.26 | 1.96E-03 | 1.11 |      |
| rs2150279  | 14 | 53343338  | C/T | <i>BMP4</i>         | 0.40 | 0.44 | 2.69E-04 | 1.17 | OK                  | 0.41 | 0.42 | 0.15     | 1.05 | 0.43 | 0.41 | 6.43E-04 | 1.09 |      |
| rs1868108  | 3  | 162073563 | G/A | <i>PPM1L</i>        | 0.31 | 0.34 | 2.70E-04 | 1.18 | Non concordant      | NA   | NA   | NA       | NA   | NA   | NA   | NA       | NA   |      |
| rs7854502  | 9  | 686683    | A/G | <i>ANKRD15</i>      | 0.46 | 0.42 | 2.71E-04 | 0.86 | OK                  | 0.45 | 0.43 | 0.09     | 0.95 | 0.43 | 0.45 | 1.61E-04 | 0.91 |      |
| rs19334    | 8  | 9047316   | T/C | <i>PPP1R3B</i>      | 0.30 | 0.34 | 2.73E-04 | 1.19 | OK                  | 0.33 | 0.32 | 0.20     | 0.95 | 0.32 | 0.32 | 0.18     | 1.03 |      |
| rs2046065  | 12 | 65458480  | T/C | <i>GRIP1</i>        | 0.44 | 0.40 | 2.74E-04 | 0.86 | OK                  | 0.44 | 0.42 | 0.06     | 0.94 | 0.41 | 0.44 | 2.69E-04 | 0.91 |      |
| rs925030   | 8  | 25298518  | A/C | <i>DOCK5</i>        | 0.41 | 0.37 | 2.74E-04 | 0.85 | OK                  | 0.40 | 0.39 | 0.07     | 0.94 | 0.38 | 0.41 | 3.14E-04 | 0.91 |      |
| rs9842991  | 3  | 70554058  | A/G | <i>LOC654340</i>    | 0.31 | 0.35 | 2.75E-04 | 1.16 | OK                  | 0.31 | 0.31 | 0.91     | 1.00 | 0.32 | 0.31 | 0.06     | 1.05 |      |
| rs9876540  | 3  | 45137320  | T/C | <i>CDCP1</i>        | 0.14 | 0.12 | 2.76E-04 | 0.81 | OK                  | 0.13 | 0.12 | 0.80     | 1.02 | 0.12 | 0.13 | 4.27E-03 | 0.92 |      |
| rs6480643  | 10 | 74204180  | T/C | <i>CCDC109A</i>     | 0.31 | 0.35 | 2.76E-04 | 1.15 | Bad cluster/stage I | NA   | NA   | NA       | NA   | NA   | NA   | NA       | NA   |      |
| rs9489765  | 6  | 120038756 | C/T | <i>LOC728727</i>    | 0.43 | 0.40 | 2.80E-04 | 0.86 | OK                  | 0.42 | 0.42 | 0.57     | 1.02 | 0.41 | 0.43 | 0.07     | 0.96 |      |
| rs10996742 | 10 | 67294261  | G/A | <i>CTNNA3</i>       | 0.19 | 0.16 | 2.81E-04 | 0.81 | OK                  | 0.18 | 0.18 | 0.40     | 1.03 | 0.18 | 0.18 | 0.11     | 0.94 |      |
| rs2896159  | 7  | 114989770 | C/T | <i>TFEC</i>         | 0.31 | 0.35 | 2.82E-04 | 1.17 | OK                  | 0.34 | 0.33 | 0.06     | 0.94 | 0.33 | 0.33 | 0.33     | 1.03 |      |
| rs10996743 | 10 | 67294317  | A/G | <i>CTNNA3</i>       | 0.19 | 0.16 | 2.82E-04 | 0.81 | OK                  | 0.18 | 0.18 | 0.44     | 1.02 | 0.18 | 0.18 | 0.09     | 0.94 |      |
| rs1453815  | 4  | 24566751  | C/T | <i>DKFZp761B107</i> | 0.23 | 0.26 | 2.83E-04 | 1.20 | OK                  | 0.24 | 0.25 | 0.22     | 1.04 | 0.25 | 0.24 | 8.57E-04 | 1.10 |      |
| rs11096577 | 2  | 19114014  | G/A | <i>FLJ41481</i>     | 0.15 | 0.18 | 2.84E-04 | 1.20 | OK                  | 0.17 | 0.16 | 0.80     | 1.00 | 0.17 | 0.16 | 0.04     | 1.07 |      |
| rs7024926  | 9  | 82766092  | A/C | <i>TLE1</i>         | 0.42 | 0.46 | 2.85E-04 | 1.16 | OK                  | 0.44 | 0.45 | 0.18     | 1.04 | 0.45 | 0.43 | 4.81E-04 | 1.09 |      |
| rs2878172  | 14 | 54443420  | G/A | <i>GCH1</i>         | 0.43 | 0.39 | 2.85E-04 | 0.87 | OK                  | 0.42 | 0.41 | 0.12     | 0.95 | 0.40 | 0.42 | 4.71E-04 | 0.92 |      |
| rs10510622 | 3  | 29670592  | C/T | <i>RBMS3</i>        | 0.18 | 0.21 | 2.85E-04 | 1.16 | OK                  |      |      |          |      |      |      |          |      |      |

|            |   |           |     |                |      |      |          |      |          |      |      |      |      |      |      |          |      |
|------------|---|-----------|-----|----------------|------|------|----------|------|----------|------|------|------|------|------|------|----------|------|
| rs708730   | 1 | 202509437 | G/A | <i>SLC41A1</i> | 0.17 | 0.15 | 2.66E-03 | 0.85 | add. SNP | 0.17 | 0.16 | 0.10 | 0.94 | 0.16 | 0.17 | 1.59E-03 | 0.90 |
| rs823156   | 1 | 204031263 | G/A | <i>SLC41A1</i> | 0.18 | 0.16 | 4.31E-03 | 0.85 | add. SNP | 0.17 | 0.16 | 0.06 | 0.93 | 0.16 | 0.18 | 7.60E-04 | 0.89 |
| rs12502586 | 4 | 15335662  | A/G | <i>BST1</i>    | 0.10 | 0.12 | 6.51E-03 | 1.20 | add. SNP | 0.10 | 0.10 | 0.89 | 1.00 | 0.11 | 0.10 | 0.07     | 1.08 |
| rs947211   | 1 | 202484322 | A/G | <i>SLC41A1</i> | 0.24 | 0.22 | 0.01     | 0.88 | add. SNP | 0.24 | 0.23 | 0.26 | 0.96 | 0.23 | 0.24 | 0.01     | 0.93 |
| rs12646913 | 4 | 15348374  | G/A | <i>BST1</i>    | 0.08 | 0.07 | 0.04     | 0.85 | add. SNP | 0.08 | 0.07 | 0.32 | 0.97 | 0.07 | 0.08 | 0.03     | 0.92 |
| rs4698412  | 4 | 15346446  | G/A | <i>BST1</i>    | 0.44 | 0.43 | 0.08     | 0.93 | add. SNP | 0.45 | 0.43 | 0.14 | 0.95 | 0.43 | 0.44 | 0.03     | 0.94 |
| rs11931532 | 4 | 15334864  | C/T | <i>BST1</i>    | 0.03 | 0.03 | 0.58     | 0.94 | add. SNP | 0.03 | 0.03 | 0.55 | 0.93 | 0.03 | 0.03 | 0.44     | 0.94 |
| rs12645693 | 4 | 15338632  | A/G | <i>BST1</i>    | 0.03 | 0.03 | 0.63     | 0.95 | add. SNP | 0.03 | 0.03 | 0.49 | 0.92 | 0.03 | 0.03 | 0.44     | 0.94 |
| rs4538475  | 4 | 15347035  | G/A | <i>BST1</i>    | 0.16 | 0.16 | 0.76     | 1.01 | add. SNP | 0.17 | 0.16 | 0.17 | 0.95 | 0.16 | 0.16 | 0.27     | 0.98 |
| rs7672311  | 4 | 15340788  | A/G | <i>BST1</i>    | NA   | NA   | NA       | NA   | add. SNP | 0.08 | 0.08 | 0.57 | 0.99 | NA   | NA   | NA       | NA   |

Table displaying the 396 SNPs with lowest p value following a trend mode of association after our Stage I analysis. For Stage II, 10 of the 384 most associated SNPs, were predicted to originate an inefficient assay with GoldenGate technology and 2 couldn't be clustered properly. These twelve SNPs were removed from further analysis and were substituted with the next most associated ones according to a trend mode of association (shaded). 345 of this final list of 384 passed our MAF, HWE and missingness filters.

Additionally the 12 SNPs are included at the bottom of the list, which were genotyped in stage II, to replicate the Asian risk loci on chromosome 1 and 4.

Position from NCBI genome build 36; chr. = Chromosome; MAF U = minor allele frequency in controls; MAF A = minor allele frequency in cases; cOR = common Odds ratio; Het = heterozygote; Hom = minor allele homozygote; CI = confidence interval.

Supplementary table 2: Additional Odds ratios for the top three SNPs of the 2 loci that surpass Bonferroni threshold for multiple testing in both stages and the top three SNPs in the *LRRK2* locus and the additional loci in chromosomes 1 and 4.

| locus                        |      |           | Alleles           | Stage I            |                    | Stage II         |                  | Stage I and II combined |                  |
|------------------------------|------|-----------|-------------------|--------------------|--------------------|------------------|------------------|-------------------------|------------------|
| SNP                          | Chr. | Position  | (minor/<br>major) | OR het. (95%CI)    | OR hom. (95%CI)    | OR het. (95%CI)  | OR hom. (95%CI)  | OR het. (95%CI)         | OR hom. (95%CI)  |
| Genome-wide significant loci |      |           |                   |                    |                    |                  |                  |                         |                  |
| rs393152                     | 17   | 41074926  | G/A               | 0.75 (0.66 - 0.84) | 0.67 (0.45 - 0.89) | 0.79 (0.72-0.87) | 0.59 (0.46-0.76) | 0.77 (0.71-0.83)        | 0.59 (0.49-0.71) |
| rs199533                     | 17   | 42184098  | T/C               | 0.71 (0.62 - 0.81) | 0.71 (0.47 - 0.96) | 0.82 (0.74-0.90) | 0.59 (0.45-0.76) | 0.77 (0.72-0.84)        | 0.61 (0.49-0.74) |
| rs17563986                   | 17   | 41347100  | C/T               | 0.75 (0.66 - 0.84) | 0.69 (0.46 - 0.92) | 0.82 (0.75-0.91) | 0.58 (0.45-0.73) | 0.79 (0.73-0.85)        | 0.60 (0.49-0.72) |
| rs2736990                    | 4    | 90897564  | C/T               | 1.17 (1.07 - 1.27) | 1.45 (1.34 - 1.56) | 1.30 (1.16-1.44) | 1.45 (1.28-1.64) | 1.25 (1.15-1.36)        | 1.51 (1.37-1.66) |
| rs3857059                    | 4    | 90894261  | G/A               | 1.35 (1.24 - 1.46) | 4.39 (3.94 - 4.84) | 1.31 (1.16-1.47) | 3.44 (1.88-6.29) | 1.34 (1.22-1.47)        | 3.57 (2.33-5.47) |
| rs11931074                   | 4    | 90858538  | T/G               | 1.35 (1.23 - 1.46) | 4.39 (3.94 - 4.84) | 1.31 (1.16-1.48) | 3.13 (1.73-5.67) | 1.33 (1.21-1.46)        | 3.31 (2.18-5.03) |
| Other loci                   |      |           |                   |                    |                    |                  |                  |                         |                  |
| rs823128                     | 1    | 203980001 | C/T               | 0.64 (0.50-0.82)   | 0.38 (0.08-1.68)   | 0.68 (0.54-0.84) | 0.51 (0.13-1.96) | 0.66 (0.56-0.77)        | 0.42 (0.16-1.12) |
| rs11240572                   | 1    | 204074636 | T/G               | 0.65 (0.50-0.83)   | 0.13 (0.01-2.30)   | 0.73 (0.59-0.90) | 0.40 (0.08-1.97) | 0.69 (0.59-0.81)        | 0.23 (0.05-1.00) |
| rs823156                     | 1    | 204031263 | C/T               | 0.86 (0.75-0.97)   | 0.72 (0.50-1.02)   | 0.89 (0.79-1.00) | 0.93 (0.69-1.24) | 0.87 (0.80-0.95)        | 0.84 (0.67-1.05) |
| rs12646913                   | 4    | 15348374  | G/A               | 0.86 (0.73-1.01)   | 0.66 (0.28-1.54)   | 0.87 (0.75-1.01) | 1.69 (0.91-3.15) | 0.86 (0.77-0.96)        | 1.21 (0.76-1.94) |
| rs4698412                    | 4    | 15346446  | G/A               | 0.98 (0.86-1.11)   | 0.85 (0.72-1.01)   | 0.94 (0.84-1.05) | 0.90 (0.78-1.04) | 0.96 (0.88-1.04)        | 0.89 (0.80-0.99) |
| rs12502586                   | 4    | 15335662  | A/G               | 1.19 (1.03-1.37)   | 1.48 (0.91-2.40)   | 1.02 (0.90-1.16) | 0.93 (0.58-1.51) | 1.09 (0.99-1.20)        | 1.14 (0.81-1.60) |
| rs11564162                   | 12   | 38729159  | C/T               | 0.89 (0.79-1.01)   | 0.44 (0.31-0.63)   | 0.96 (0.88-1.06) | 0.80 (0.64-1.01) | 0.93 (0.86-1.00)        | 0.67 (0.55-0.80) |
| rs2896905                    | 12   | 38779683  | T/C               | 0.84 (0.74-0.95)   | 0.67 (0.56-0.80)   | 1.03 (0.94-1.14) | 1.01 (0.88-1.16) | 0.95 (0.88-1.03)        | 0.86 (0.77-0.96) |
| rs1491923                    | 12   | 38877384  | C/T               | 1.07 (0.95-1.21)   | 1.52 (1.26-1.84)   | 1.04 (0.95-1.14) | 1.25 (1.07-1.46) | 1.06 (0.98-1.14)        | 1.35 (1.20-1.52) |

Position from NCBI genome build 36; chr. = Chromosome; OR = Odds ratio; Het = heterozygote; Hom = minor allele homozygote; CI = confidence interval.

Supplementary table 3: Additive minor allele dosages for each SNP within each of the *SNCA* and *MAPT* loci in combined German and US samples were used in the conditional models to test for possible independence of association with PD. Shown are the results of this analysis.

| <i>Conditional logistic regression at SNCA</i> |            |          |              |        |          |
|------------------------------------------------|------------|----------|--------------|--------|----------|
| CHR                                            | SNP        | BP       | minor allele | OR     | P        |
| 4                                              | rs1430961  | 90771943 | C            | 0.9198 | 0.5581   |
| 4                                              | rs12644119 | 90822442 | A            | 1.164  | 0.2612   |
| 4                                              | rs356229   | 90825620 | G            | 1.001  | 0.9834   |
| 4                                              | rs11931074 | 90858538 | T            | 0.7196 | 0.72     |
| 4                                              | rs3857059  | 90894261 | G            | 2.196  | 0.3987   |
| 4                                              | rs2736990  | 90897564 | C            | 1.21   | 0.003432 |
| 4                                              | rs3775439  | 90928764 | A            | 0.9394 | 0.5558   |
| 4                                              | rs894278   | 90953558 | G            | 0.8577 | 0.4264   |
| 4                                              | rs6532197  | 91016324 | G            | 0.9382 | 0.6937   |

Supplementary table 4: SNPs at the *SNCA* locus in PD, Controls and MSA. Comparing 92 pathologically proven MSA cases genotyped at the same markers and previously reported by us<sup>14</sup> with the current data shows a difference between the PD and MSA risk SNPs, rs2736990 being the most significant PD associated SNP and not significantly associated with MSA. Further the most highly associated marker with MSA (rs11931074) is significantly different between PD and MSA ( $p=7 \times 10^{-4}$ ).

| SNP        | Allele | Minor Allele Frequency |       |       | P values  |            |           |
|------------|--------|------------------------|-------|-------|-----------|------------|-----------|
|            |        | PD                     | MSA   | CON   | PD vs Con | MSA vs Con | MSA vs PD |
| rs1430961  | C      | 0.093                  | 0.11  | 0.082 | 0.0191    | 0.1741     | 0.4283    |
| rs12644119 | A      | 0.124                  | 0.163 | 0.108 | 0.0016    | 0.0178     | 0.1193    |
| rs356229   | G      | 0.402                  | 0.359 | 0.363 | 1.12E-06  | 0.8937     | 0.2371    |
| rs11931074 | T      | 0.098                  | 0.174 | 0.076 | 7.87E-07  | 8.91E-07   | 7.00E-04  |
| rs3857059  | G      | 0.098                  | 0.152 | 0.075 | 6.46E-07  | 1.00E-04   | 0.0152    |
| rs2736990  | T      | 0.509                  | 0.473 | 0.46  | 2.90E-09  | 0.7379     | 0.3365    |
| rs3775439  | A      | 0.145                  | 0.217 | 0.13  | 0.007     | 5.00E-04   | 0.0062    |
| rs894278   | G      | 0.074                  | 0.103 | 0.06  | 4.00E-04  | 0.0146     | 0.1392    |
| rs6532197  | G      | 0.089                  | 0.141 | 0.076 | 0.0027    | 0.001      | 0.0148    |

Supplementary table 5: expression quantitative trait analysis of most significant disease associated SNPs at the *SNCA*, *MAPT*, *LRRK2* and *PARK16* loci. Shown are the association p values between allele load each SNP and the expression levels of the most proximal transcripts.

| CHR | SNP       | Transcript       | Illumina Probe ID | p value                |
|-----|-----------|------------------|-------------------|------------------------|
| 4   | rs2736990 | <i>SNCA</i>      | 1110228           | 0.3479                 |
| 4   | rs2736990 | <i>SNCA</i>      | 6840092           | 0.5497                 |
| 4   | rs2736990 | <i>MMRN1</i>     | 940328            | 0.8847                 |
| 17  | rs393152  | <i>STH</i>       | 1050195           | 0.3241                 |
| 17  | rs393152  | <i>ARL17P1</i>   | 1780139           | 0.0002787              |
| 17  | rs393152  | <i>NSF</i>       | 2030397           | 0.03584                |
| 17  | rs393152  | <i>KIAA1267</i>  | 2320280           | 0.07785                |
| 17  | rs393152  | <i>LOC474170</i> | 2490142           | 0.1312                 |
| 17  | rs393152  | <i>C17orf69</i>  | 3120403           | 0.6945                 |
| 17  | rs393152  | <i>ARHGAP27</i>  | 3120647           | 0.9138                 |
| 17  | rs393152  | <i>WNT3</i>      | 3780440           | 0.1844                 |
| 17  | rs393152  | <i>NSF</i>       | 3830040           | 0.00311                |
| 17  | rs393152  | <i>LRRC37A</i>   | 4390484           | $1.70 \times 10^{-13}$ |

|    |           |                 |              |                       |
|----|-----------|-----------------|--------------|-----------------------|
| 17 | rs393152  | <i>CRHR1</i>    | 4880730      | 0.6454                |
| 17 | rs393152  | <i>PLEKHM1</i>  | 6760575      | 0.5906                |
| 17 | rs393152  | <i>MAPT</i>     | 7400379      | 4.11x10 <sup>-6</sup> |
| 1  | rs823128  | <i>RAB7L1</i>   | 1820082      | 0.126                 |
| 1  | rs823128  | <i>NUCKS1</i>   | 4730386      | 0.813                 |
| 12 | rs1491923 | <i>SLC2A13</i>  | 4730132      | 0.1398                |
| 12 | rs1491923 | <i>C12orf40</i> | 7380202      | 0.4383                |
| 12 | rs1491923 | <i>LRRK2</i>    | not detected | NA                    |

Supplementary table 6: Adjusted p values from the addition models of association applied.

| MarkerName | chr | bp        | P.value   |
|------------|-----|-----------|-----------|
| rs2736990  | 4   | 90897564  | 2.40E-08  |
| rs356220   | 4   | 90860363  | 1.47E-07  |
| rs3857059  | 4   | 90894261  | 2.57E-07  |
| rs11931074 | 4   | 90858538  | 3.19E-07  |
| rs3775439  | 4   | 90928764  | 7.70E-06  |
| rs12644119 | 4   | 90822442  | 4.15E-05  |
| rs894278   | 4   | 90953558  | 8.41E-05  |
| rs356229   | 4   | 90825620  | 0.0001322 |
| rs199533   | 17  | 42184098  | 5.78E-06  |
| rs415430   | 17  | 42214305  | 1.09E-05  |
| rs169201   | 17  | 42145386  | 1.21E-05  |
| rs393152   | 17  | 41074926  | 2.50E-05  |
| rs12185268 | 17  | 41279463  | 3.00E-05  |
| rs1981997  | 17  | 41412603  | 3.07E-05  |
| rs2668692  | 17  | 41648797  | 6.52E-05  |
| rs2896905  | 12  | 38779683  | 2.14E-05  |
| rs10784359 | 12  | 38732017  | 4.57E-05  |
| rs6582668  | 12  | 37052871  | 4.83E-05  |
| rs11564162 | 12  | 38729159  | 6.28E-05  |
| rs4508240  | 12  | 37186069  | 0.0001047 |
| rs2387807  | 12  | 36733128  | 0.0001072 |
| rs974627   | 12  | 37205791  | 0.0001294 |
| rs823128   | 1   | 203980001 | 0.0003834 |
| rs823156   | 1   | 204031263 | 0.008226  |
| rs11240572 | 1   | 204074636 | 0.0001927 |
